# Supplementary material for: Association of Obesity With Septic Complications After Major Abdominal Surgery: A Secondary Analysis of the RELIEF Randomized Clinical Trial
Source: PubMed Central journal article supplement (PMC6902846; doi:10.1001/jamanetworkopen.2019.16345), 2019-11-27

## Supplementary Online Content

Gurunathan U, Rapchuk IL, Dickfos M, et al. Association of obesity with septic complications after major abdominal surgery: a secondary analysis of the RELIEF randomized clinical trial. *JAMA Netw Open*. 2019;2(11):e1916345.  
doi:10.1001/jamanetworkopen.2019.16345

**eTable 1.** Participants' Eligibility Criteria

**eTable 2.** Results From Regression Analyses for All Outcomes With Adjusted Adiposity Variables

**eFigure 1.** Histograms of Waist Circumference, Waist-to-Hip Ratio, and BMI for 2755 Participants

**eFigure 2.** Fitted Risk Prediction Model for Disability or Death to 90 Days

**eFigure 3.** Fitted Risk Prediction Model for Septic Complications or Death to 30 Days

**eFigure 4.** Fitted Risk Prediction Model for Any Major Septic Complication

**eFigure 5.** Fitted Risk Prediction Model for Pulmonary Edema

**eFigure 6.** Fitted Risk Prediction Model for Acute Kidney Injury

**eFigure 7.** Fitted Risk Prediction Model for Unplanned ICU Admission to 30 Days

This supplementary material has been provided by the authors to give readers additional information about their work.

## **eTable 1: Participants' Eligibility Criteria**

### **Inclusion criteria:**

Adults 18 years and older undergoing elective major abdominal surgery of

- a. at least 2 hours duration
- b. hospital stay of at least 3 days and
- c. at increased risk of postoperative complications, defined as at least one of the following criteria:
  - i. age  $\geq 70$  years,
  - ii. known or documented history of coronary artery disease,
  - iii. known or documented history of heart failure,
  - iv. diabetes currently treated with an oral hypoglycemic agent and/or insulin,
  - v. preoperative serum creatinine  $>200 \mu\text{mol/L}$  ( $>2.8 \text{ mg/dl}$ ),
  - vi. morbid obesity ( $\text{BMI} \geq 35 \text{ kg/m}^2$ ),
  - vii. preoperative serum albumin  $<30 \text{ g/L}$ ,
  - viii. anerobic threshold (if done)  $<12 \text{ mL/kg/min}$ ,
  - ix. r) two or more of the following risk factors: American Society of Anesthesiologists (ASA) physical status 3 or 4, chronic respiratory disease, obesity ( $\text{BMI} 30\text{-}35 \text{ kg/m}^2$ ), aortic or peripheral vascular disease, preoperative hemoglobin  $<100 \text{ g/L}$ , preoperative serum creatinine  $150\text{-}199 \mu\text{ mol/L}$  ( $>1.7 \text{ mg/dl}$ ), anerobic threshold (if done)  $12\text{-}14 \text{ mL/kg/min}$ .

### **Exclusion criteria:**

- a. urgent or time-critical surgery,
- b. ASA physical status 5
- c. pulmonary or cardiac surgery
- d. liver resection
- e. minor or intermediate surgery
- f. end-stage kidney failure requiring dialysis

**eTable 2.** Results From Regression Analyses for All Outcomes With Adjusted Adiposity Variables

| Outcomes                                          | Adiposity variable  | N    | Adjusted OR for each SD increase in the adiposity variable* | 95% CI      | P-value |
|---------------------------------------------------|---------------------|------|-------------------------------------------------------------|-------------|---------|
| Composite 30-day mortality or septic complication | Waist circumference | 2636 | <b>1.58<sup>a**, b**</sup></b>                              | 1.25 - 2.01 | <0.001  |
|                                                   | WHR                 |      | 0.96                                                        | 0.84 - 1.10 | 0.552   |
|                                                   | BMI                 |      | 0.90                                                        | 0.72 - 1.12 | 0.324   |
| Composite disability event or death               | Waist circumference | 2661 | 1.37                                                        | 1.04 - 1.81 | 0.024   |
|                                                   | WHR                 |      | 1.01                                                        | 0.87 - 1.16 | 0.936   |
|                                                   | BMI                 |      | 0.91                                                        | 0.70 - 1.18 | 0.457   |
| Septic complications                              | Waist circumference | 2636 | <b>1.57<sup>a**, b*</sup></b>                               | 1.24 - 2.00 | <0.001  |
|                                                   | WHR                 |      | 0.97                                                        | 0.85 - 1.11 | 0.679   |
|                                                   | BMI                 |      | 0.90                                                        | 0.72 - 1.13 | 0.371   |
| Pulmonary edema                                   | Waist circumference | 1695 | 1.53                                                        | 0.70 - 3.34 | 0.282   |
|                                                   | WHR                 |      | 1.11                                                        | 0.77 - 1.60 | 0.566   |
|                                                   | BMI                 |      | 1.11                                                        | 0.51 - 2.44 | 0.786   |
| Acute kidney injury                               | Waist circumference | 2598 | 1.52                                                        | 1.00 - 2.30 | 0.048   |
|                                                   | WHR                 |      | 1.15                                                        | 0.93 - 1.41 | 0.203   |
|                                                   | BMI                 |      | 0.79                                                        | 0.52 - 1.21 | 0.282   |
| Unplanned ICU                                     | Waist circumference | 2611 | 1.25                                                        | 0.91 - 1.71 | 0.177   |
|                                                   | WHR                 |      | 1.08                                                        | 0.91 - 1.28 | 0.372   |
|                                                   | BMI                 |      | 1.58                                                        | 0.58 - 1.09 | 0.152   |

WHR: waist-to-hip ratio, BMI: body mass index, ICU: intensive care unit

\*From multivariable models including all three adiposity variables and adjusting for age, sex, smoking status, study center and treatment arm.

Superscripts: a = comparison of Waist circumference with WHR, b = comparison of Waist circumference with BMI; \*\* is  $P < 0.01$ , \* is  $0.01 \leq P < 0.05$

Example: Composite outcome: a\*\*, b\* means Waist vs WHR  $P < 0.01$ , Waist vs BMI  $0.01 \leq P < 0.05$

**e Figure 1.** Histograms of Waist Circumference, Waist-to-Hip Ratio, and BMI for 2755 Participants

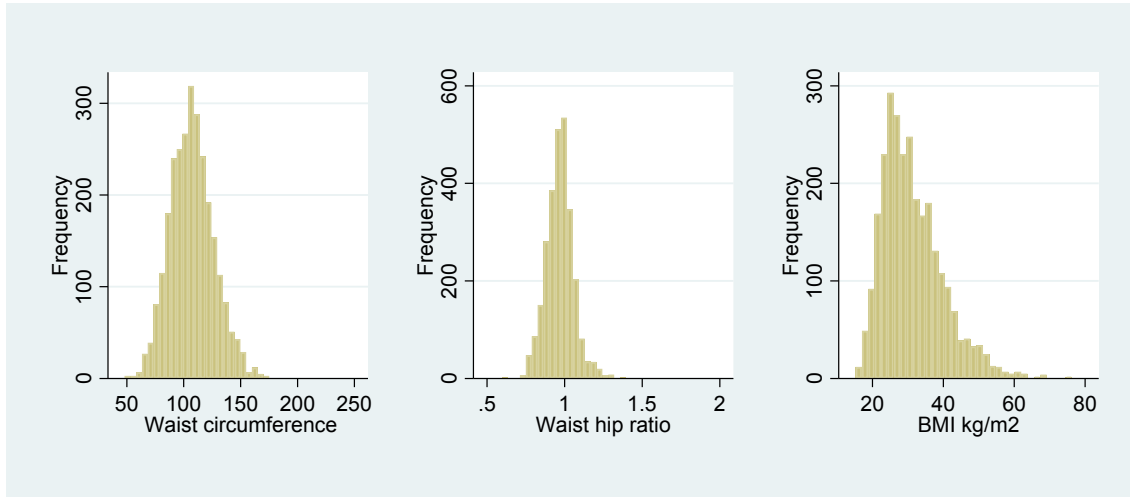

*BMI: Body Mass Index*

**eFigure 2.** Fitted Risk Prediction Model for Disability or Death to 90 Days

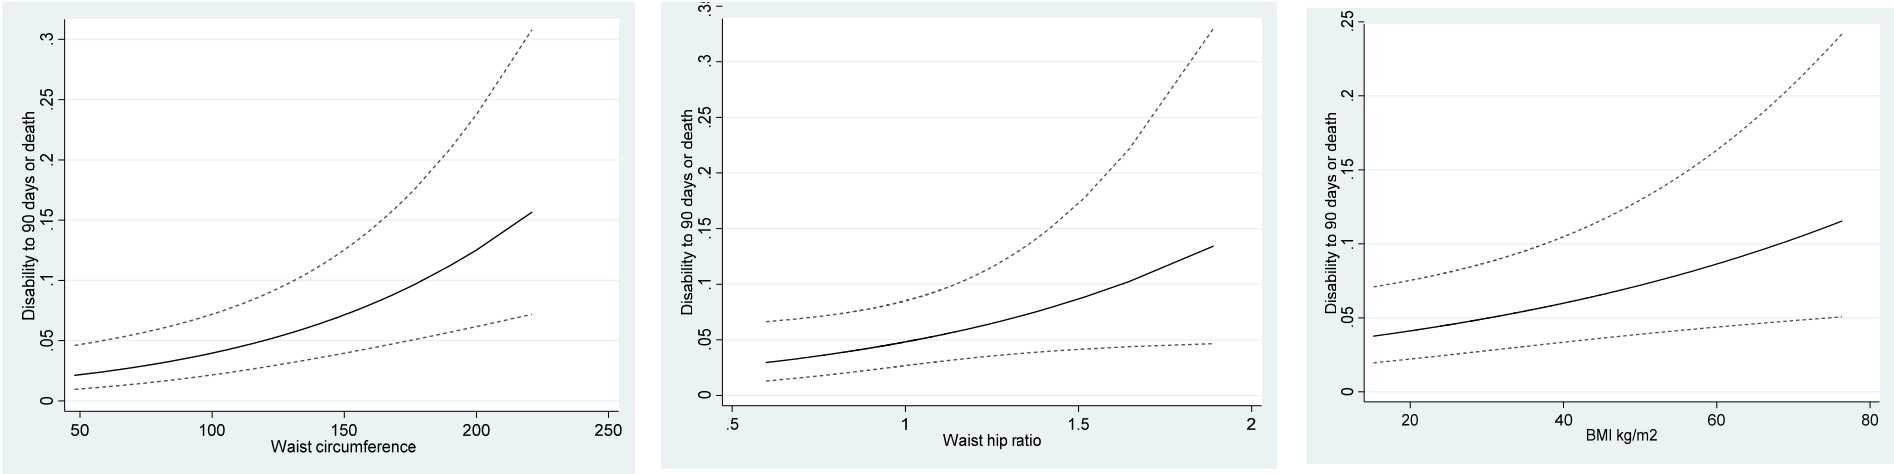

# *Graphs indicate the model for study center no:1*

**eFigure 3.** Fitted Risk Prediction Model for Septic Complications or Death to 30 Days

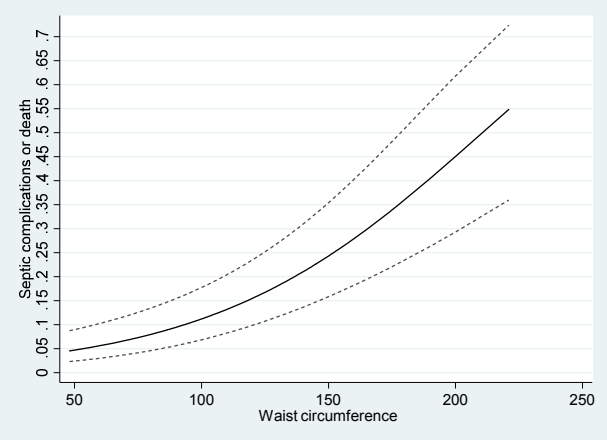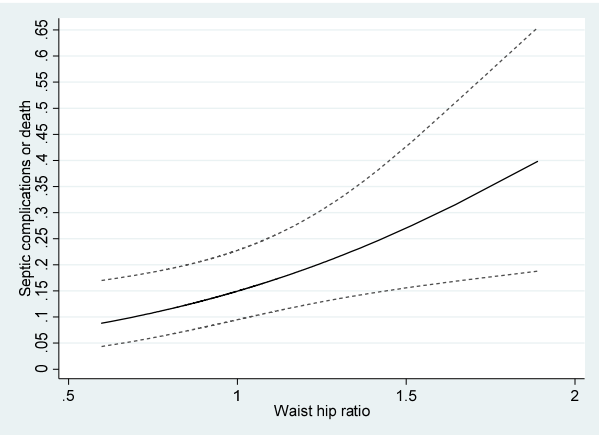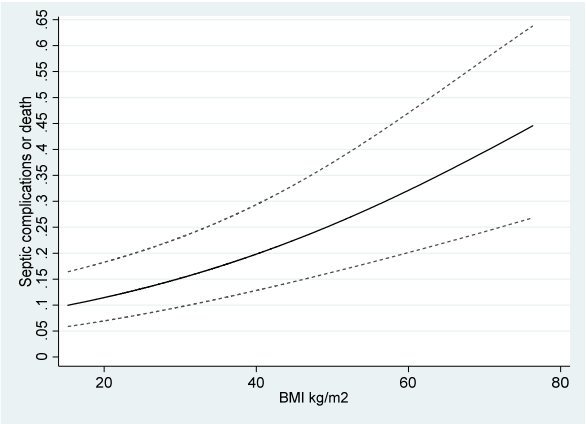

**eFigure 4.** Fitted Risk Prediction Model for Any Major Septic Complication

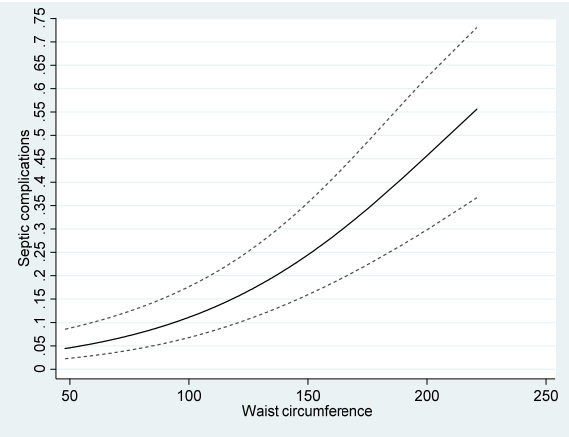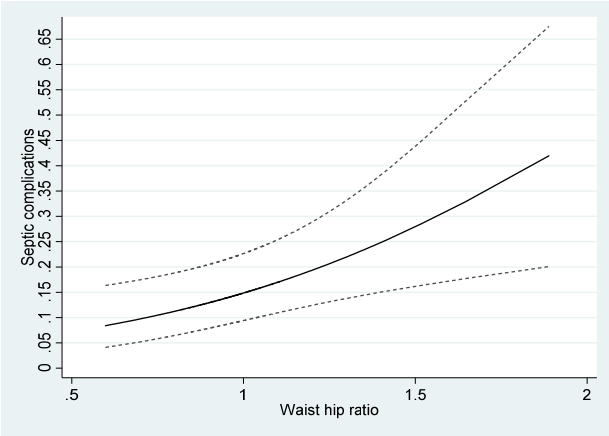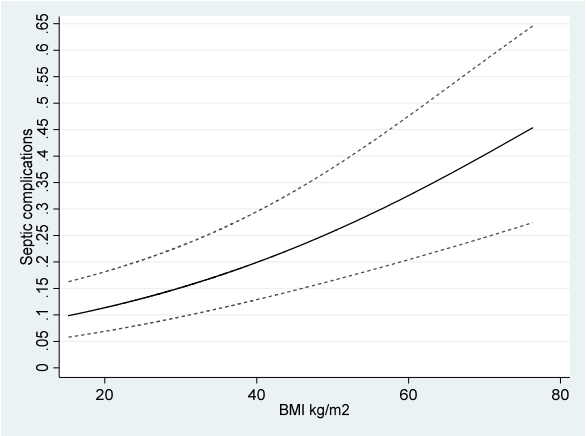

**eFigure 5.** Fitted Risk Prediction Model for Pulmonary Edema

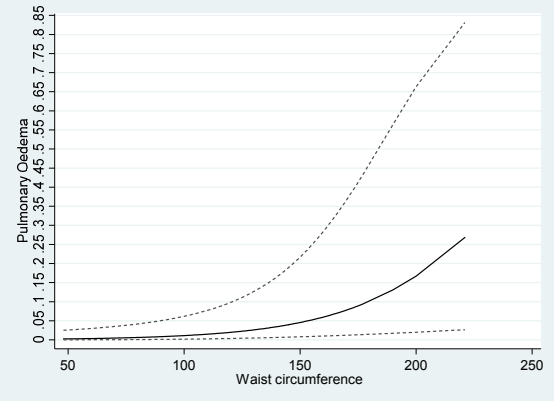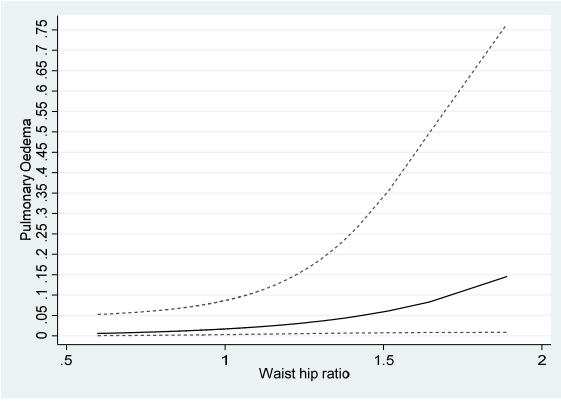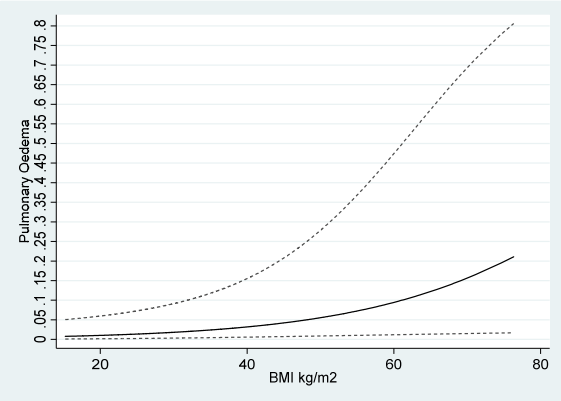



**eFigure 6.** Fitted Risk Prediction Model for Acute Kidney Injury

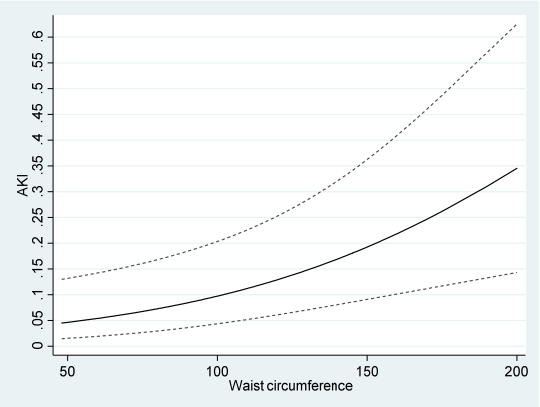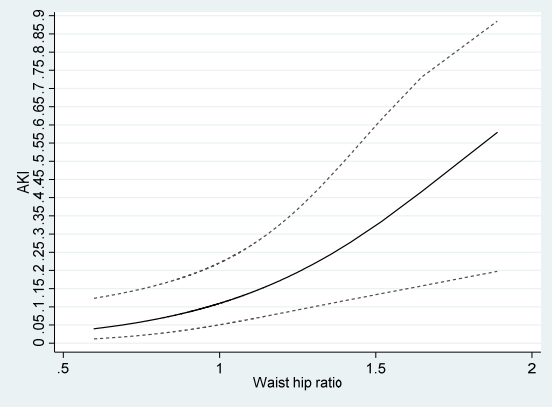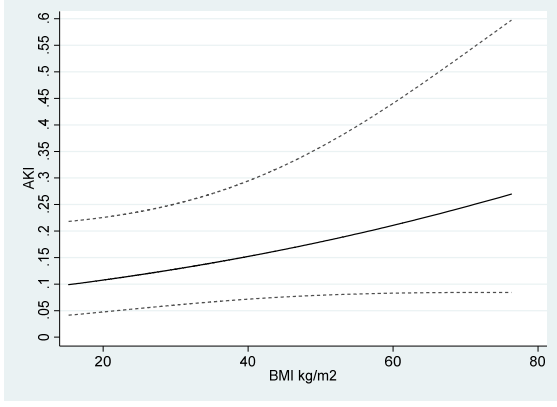

**eFigure 7.** Fitted Risk Prediction Model for Unplanned ICU Admission to 30 Days

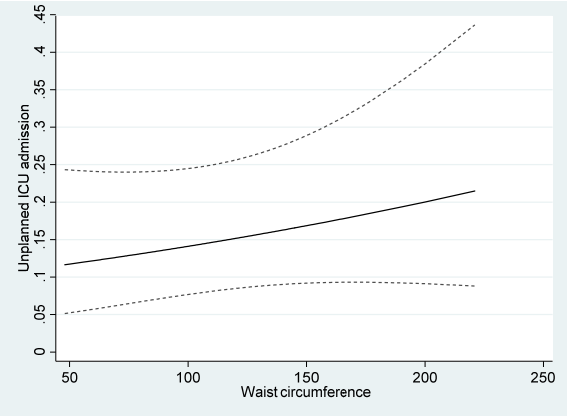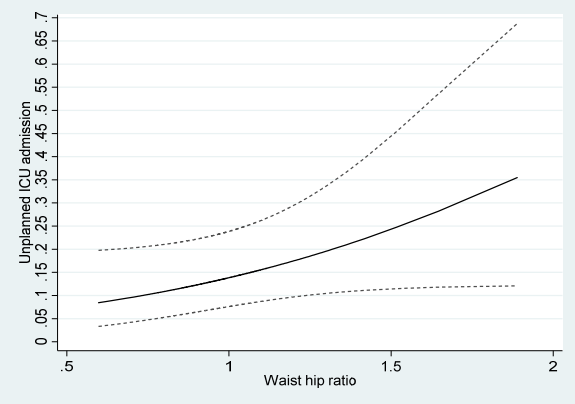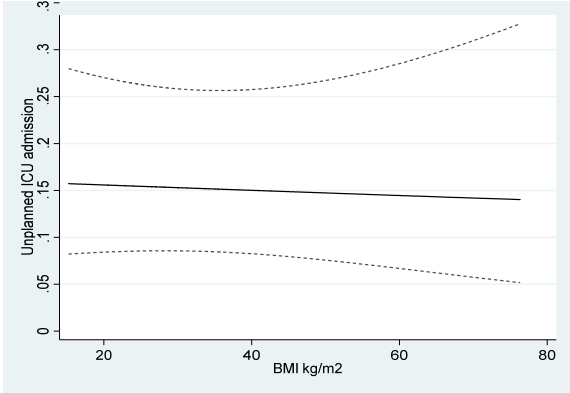

Supplement: jamanetwopen-2-e1916345-s002.pdf [file jamanetwopen-2-e1916345-s002.pdf]
