# Supplementary material for: Association of Obesity With Septic Complications After Major Abdominal Surgery: A Secondary Analysis of the RELIEF Randomized Clinical Trial
Source: PubMed Central journal article supplement (PMC6902846; doi:10.1001/jamanetworkopen.2019.16345), 2019-11-27
Supplement: jamanetwopen-2-e1916345-s001.pdf [file jamanetwopen-2-e1916345-s001.pdf]

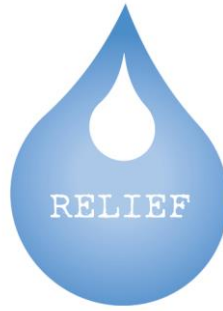

## The RELIEF Trial

**RE**strictive versus **LI**beral **F**luid Therapy in Major Abdominal Surgery

[www.relief.org.au](http://www.relief.org.au)

On behalf of the Australian and New Zealand College of Anaesthetists Trials Group (ANZCA TG), and the Australian and New Zealand Intensive Care Society Clinical Trials Group (ANZICS CTG)

ClinicalTrials.gov Identifier: NCT01424150

**Protocol Version 2: 11<sup>th</sup> April 2013**

Study title: Restrictive versus liberal fluid therapy in major abdominal surgery

Protocol Number: Anaesthesia Research 046

Sponsor: Alfred Health, Melbourne

Funding source: The Australian National Health and Medical Research Council (APP1043755)

50  
51  
52  
53  
54  
55  
56  
57  
58  
59  
60  
61  
62  
63  
64  
65  
66  
67

**AGREEMENT**

This document is confidential. The Investigators declare that they have read the final study protocol and any amendments. The Investigators will conduct the study according to the procedures specified in the study protocol, and in accordance with ICH GCP notes for Guidance on Good Clinical Practice (CPMP/ICH/135/95) and the Australian NH&MRC National Statement on Ethical Conduct in Research Involving Humans.

.....  
Investigator

.....  
Date

68 **RELIEF: REstrictive versus LIBeral Fluid Therapy in Major Abdominal Surgery**

69

70

71

**Principal Investigator**

72

Paul Myles, MB.BS, MPH, MD, FCARCSI, FANZCA, FRCA

73

Director, Department of Anaesthesia and Perioperative Medicine, Alfred Hospital and Monash University

74

75

**Intensive Care**

76

Rinaldo Bellomo, MB.BS, MD, FRACP, FCICM, PGDipEcho

77

Co-Director of the ANZIC-RC and the Director of Intensive Care Research at Austin Health

78

79

**Anaesthesia**

80

Tomas Corcoran, MB, BCh, BAO, MRCPI, FCARCSI, MD, FCICM

81

Department of Anaesthesia and Pain Medicine, Royal Perth Hospital; School of Medicine and Pharmacology, University of Western Australia

82

83

84

Philip Peyton, MD, PhD, MB.BS, FANZCA, PGDipEcho

85

Staff Anaesthetist, Department of Anaesthesia, Austin Health

86

87

David Story, MBBS, MD, BMedSci, FANZCA

88

Chair of Anaesthesia; and Head, Centre for Anaesthesia, Perioperative and Pain Medicine; The University of Melbourne

89

90

Kate Leslie, MB.BS, MD, M Epi, FANZCA

91

Staff Anaesthetist, Department of Anaesthesia and Pain Management, Royal Melbourne Hospital; University of Melbourne; Monash University

92

93

94

**Surgery**

95

Chris Christophi, MB.BS, FRACS

96

Director of Surgery, Austin Hospital and University of Melbourne

97

98

Jonathan Serpell, MB.BS, MD, Med, FRACS, FACS

99

Director, Department of General Surgery, Alfred Hospital and Monash University

100

101

**Statistician**

102

Andrew Forbes MSc, PhD

103

Head, Biostatistics Unit, Department of Epidemiology & Preventive Medicine, Monash University

104

105

106

**Research Manager:** Sophie Wallace

107

108

**Data and Safety Monitoring Committee**

109

Monty Mythen (Chair, *intensivist*, Smiths Medical Professor of Anaesthesia & Critical Care, University College London (UK);

110

Russell Gruen (*surgeon*), Guy Ludbrook (*anaesthetist*), John McNeil (*epidemiologist*), Katherine Lee (*statistician*).

111

112

**Endpoint Adjudication Committee:** David McIlroy, Mark Shulman, Jamie Cooper

113

114

**Governance and Data Quality Manager:** Stephanie Poustie

115

116

117

118

119

120

121

122

123

**ABBREVIATIONS**

124

125

ACE – angiotensin converting enzyme

126

ANZCA TG – Australian and New Zealand College of Anaesthetists Trials Group

127 ANZICS CTG – Australian and New Zealand Intensive Care Society Clinical Trials Group  
128 APTT – activated partial thromboplastin time  
129 ARB – angiotensin-II receptor blocker  
130 ASA – American Association of Anesthesiologists  
131 ATACAS – Aspirin and Tranexamic Acid for Coronary Artery Surgery trial  
132 BMI - Body Mass Index  
133 BP – Blood Pressure  
134 CXR – Chest X-Ray  
135 CRF – Case Report Form  
136 CT - computed tomography scan  
137 CVP – Central Venous Pressure  
138 CD - Compact Disc  
139 CDC - Centers for Disease Control and Prevention  
140 CRP - C-reactive protein  
141 DO<sub>2</sub> – Tissue oxygen delivery  
142 DSMC – Data Safety and Monitoring Committee  
143 EAC – Endpoint Adjudication Committee  
144 ECG - Electrocardiography  
145 ENIGMA – Evaluation of Nitrous Oxide in the Gas mixture for Anaesthesia  
146 ENIGMA-II - Nitrous oxide anaesthesia and cardiac morbidity after major surgery  
147 ERAS – Enhanced Recovery After Surgery  
148 FiO<sub>2</sub> – Fraction of Inspired Oxygen  
149 FTc – Flow Time Corrected  
150 GA – General Anaesthesia  
151 GCP – Good Clinical Practice  
152 GFR - Glomerular filtration Rate  
153 HR – Heart Rate  
154 HDU – High Dependency Unit  
155 INR - International Normalized Ratio  
156 ICP – Intracranial Pressure  
157 ICU – Intensive Care Unit  
158 IV - Intravenous  
159 IVRS – Interactive Voice Response System  
160 L - Litres  
161 PRN - as the occasion arises; as needed.  
162 RIFLE - Risk, Injury, Failure, Loss, and End-stage kidney classification  
163 NHMRC – Australian National Health and Medical Research Council  
164 NHSN - National Healthcare Safety Network  
165 mmol/L – Millimole per Litre  
166 mmHg - millimetres of mercury  
167 OR – Operating Room  
168 PA – Pulmonary Artery  
169 PaO<sub>2</sub> – Arterial partial pressure of oxygen  
170 PI&CF – Patient Information and Consent form  
171 PPV - Positive Pressure Ventilation  
172 QoR-40 – 40-item Quality of Recovery score  
173 SAFE - Saline versus Albumin Fluid Evaluation study  
174 sBP – Systolic Blood Pressure  
175 SVV – Stroke Volume Variation  
176 TGA – Australian Therapeutic Goods Administration  
177 TOE – transoesophageal echocardiography, or TEE  
178 WCC – White Cell Count  
179 WHODAS - World Health Organization Disability Assessment Schedule  
180  
181

182 **TRIAL SUMMARY**

183

184 **Design:** This will be a large, randomized, parallel-group, controlled trial. After stratification by centre *and* planned  
185 ICU/HDU admission (or not), patients will be randomly assigned from a computer-generated list (1:1) to either a  
186 Restrictive or Liberal fluid Group.

187

188 **Group 1** = Restrictive fluid regimen (intraoperative and 1<sup>st</sup> 24 h ≈2.5 L)

189

**Group 2** = Liberal fluid regimen (intraoperative and 1<sup>st</sup> 24 h ≈5.5 L)

190

191 **Sample Size:** 2800 patients

192

193 **Study Duration:** 3 years

194

195 **Primary Endpoint**

196 Disability-free survival up to 1 year: survival and freedom from new-onset disability, the latter being a persistent (>6  
197 months) reduction in functional status as defined by a 25% (4-point) or greater increase in the 12-item version of  
198 WHODAS to a final score of at least 25%. Disability will be assessed by the participant, but if unable then we will use the  
199 proxy's report. The date of onset of new disability will be recorded.

200

201 **Interim analysis (& DSMC review):** at n= 1000 and 2000 patients

202

203

204

205

205 **1. AIM OF THE TRIAL**

206 To investigate the effectiveness of fluid restriction (vs. liberal), and the possible effect-modification of goal-directed  
207 therapy (eg. oesophageal Doppler, Flotrac®). The first will be randomly assigned; the latter will be measured covariates  
208 according to local practices and beliefs.

209

210 The optimal fluid regimen and haemodynamic (or other) targets for patients undergoing major surgery are based on  
211 rationales that are not supported by strong evidence. Practices vary substantially; guidelines are vague, small trials and  
212 meta-analyses are contradictory. The strongest and most consistent evidence, and biological plausability regarding  
213 tissue oedema, supports a restrictive fluid strategy. There is less (and more contradictory) evidence supporting goal-  
214 directed therapy using a flow-directed device and/or dopexamine, and use and choice of colloids. A large, definitive  
215 clinical trial evaluating perioperative fluid replacement in major surgery is required.

216

217

218

218 **1.1 Study Hypotheses**

219 A restrictive fluid regimen for adults undergoing major abdominal surgery leads to reduced complications and  
220 improved disability-free survival when compared with a liberal fluid regimen.

221

222 Secondary hypotheses: The effects of fluid restriction are similar whether or not goal-directed therapy is used  
223 (assessed as a statistical test of interaction). A restrictive fluid regimen will reduce a composite of 30-day septic  
224 complications and mortality.

225

226

227

228

229 **2. BACKGROUND**

230 Anaesthetists typically manage perioperative hypotension in the first instance with an intravenous (IV) fluid bolus of a  
231 balanced salt crystalloid solution, or sometimes with one of several colloids. If persistent or more profound  
232 hypotension occurs, particularly in the intraoperative period when anaesthetic drug-induced vasodilation is common,  
233 an IV vasoconstrictor (typically metaraminol bolus prn) is used. Similar approaches are used in the intensive care unit  
234 (ICU) and surgical wards. We simply don't know whether using a 'liberal' fluid strategy based primarily on  
235 supplemental IV fluids, or a 'restrictive' strategy based on altered haemodynamic goals and/or vasopressor drug  
236 therapy, is best for most patients undergoing major surgery. The evidence base for fluid management in the  
237 postoperative setting is poor and is insufficient to guide our practice (1-4). Anaesthetists, intensivists and surgeons  
238 differ in their approaches to perioperative fluid therapy (5, 6).

239  
240 Around 250 million people undergo major surgery each year around the world (7), with about 2 million being in  
241 Australia (1 in 10 Australians), and a growing proportion (now 40%) being elderly. By 2056 in Australia, more than 8.5  
242 million anaesthetics (>50%) will be administered to patients over the age of 65 (8). These patients and many others  
243 have co-existent medical diseases that add risk to the procedure. The personal, social and economic consequences of  
244 postoperative complications, additional hospital stay, and long-term disability, are great.

245  
246 Both colloids and crystalloids are used for fluid resuscitation and maintenance, but it is the amount of fluids  
247 administered and the goals of resuscitation that need re-evaluation. Since the 1950s, when it was first claimed that  
248 after surgery fluids are redistributed to a theoretical 'third space' (9), perioperative IV fluid replacement has included  
249 replacement of such third-space losses with crystalloid. In fact there are many reasons why clinicians administer  
250 generous amounts of IV fluids during and after surgery. Concerns about reversing preoperative dehydration, support  
251 ingthe circulation after general and regional anaesthesia, avoiding gut hypoperfusion and promoting tissue oxygen  
252 delivery, avoiding blood transfusion, and maintaining urine output are common (10-12). Optimizing tissue perfusion  
253 typically requires more fluid than indicated by normal clinical criteria or with invasive monitoring (10). Occult  
254 hypovolaemia and intraoperative gut hypoperfusion occurs in around 60% of major surgery patients, both of which are  
255 linked to increases in morbidity and mortality (11). Further support for this comes from some studies showing that a  
256 liberal fluid strategy in patients undergoing minor surgery, mostly in the ambulatory setting, improves early recovery  
257 measures such as dizziness, nausea and thirst, and may improve pulmonary function, exercise capacity, and shorten  
258 hospital stay (13). Similarly in the ICU setting, with some small trials suggest that fluid supplementation and optimized  
259 haemodynamics reduce organ dysfunction, postoperative morbidity and death (14, 15).

260  
261 If fluid administration is restricted it is likely that hypotension will be treated with vasopressor therapy. Vasopressors  
262 may impair organ perfusion, threaten local tissues at the site of IV administration, cause arrhythmias, or be mistakenly  
263 used when hypovolaemia is the underlying cause.

264  
265 But excess fluid administration causes oedema, with increased pulmonary morbidity (16), impaired coagulation (17),  
266 bacterial translocation and sepsis (18), and poor wound healing (19). In contrast to the above, other small trials of  
267 patients undergoing abdominal surgery have found that fluid restriction lead to reduced morbidity and hospital stay  
268 (12, 13). This conflicting evidence explains why there are diverse and varied practices around the world. Several expert  
269 guideline/consensus statements have been published, with most supporting restrictive fluid administration (2, 20). But  
270 all come to similar conclusions: High-grade evidence regarding the optimal fluid regimen is currently lacking (20).

271  
272 **2.1 Liberal or Restrictive IV Fluid Resuscitation**

273 Traditional perioperative IV fluid regimens in abdominal surgery can lead to patients receiving 3 to 7 L of fluid on the  
274 day of surgery and more than 3 L/day for the following 3 to 4 days, leading to a 3- to 6-kg weight gain (21, 22). Several  
275 small trials have compared restrictive and liberal fluid regimens (3, 23, 24).

276  
277 Lobo et al (15) did a tightly-controlled randomized trial in 20 adult patients having colonic surgery. The liberal group,  
278 representing 'standard' care, received IV fluids in accordance with their present hospital practice ( $\geq 3$  L/day) and the  
279 restrictive group received  $\leq 2$  L water and sodium 77 mmol per day. All patients had no comorbidity other than colonic  
280 cancer. The restrictive group had shorter median gastric emptying times, less complications (0 vs. 7,  $P=0.01$ ) and  
281 shorter hospital stay (6 vs. 9 days,  $P=0.001$ ). Brandstrup et al (17) did a randomized trial comparing similar fluid  
282 regimens in 172 colorectal surgical patients. The restrictive group had fewer postoperative complications (33% vs. 51%,  
283  $P=0.013$ ) and less deaths (0 vs. 4,  $P=0.12$ ). Nisenavich et al (25) compared liberal and restrictive fluid regimens in 152  
284 patients undergoing elective abdominal surgery. The restrictive group had faster return of bowel function, less  
285 complications ( $P=0.046$ ), and shorter hospital stay ( $P=0.01$ ). Similar benefits were found in recent trials in colorectal  
286 and abdominal aortic surgery (26, 27).

287

288 However, Kabon et al (26) compared similar fluid regimens in 253 colorectal surgical patients and found no difference  
 289 in the rates of wound infection, restrictive group 14% vs. liberal group 11% (P=0.46). Holte et al (22) compared two  
 290 fluid regimens with physiological recovery as the primary outcome measure in 32 patients undergoing fast-track  
 291 colonic surgery. The rate of complications tended to be higher in the restrictive group (6 vs. 1, P = 0.08). A meta-  
 292 analysis of the fluid trials up to 2007 (3) found restrictive regimens reduced overall complications, OR 0.41 (95% CI:  
 293 0.22-0.77), P=0.005; but the authors noted the heterogeneity of fluid regimens and definitions of outcomes. Another  
 294 two recent small trials found either no benefit (27) or harm (28).

296 We have done an updated meta-analysis of relevant trials (12 trials, 1160 patients) to evaluate the overall effect of  
 297 fluid restriction on mortality (see Fig 1) and some morbidities (23). We could not pool overall complications because of  
 298 their variability and inconsistency of counting. About half the trials did not measure or report mortality, so this  
 299 outcome is underpowered. We found some possible benefits of fluid restriction:

- 300 • Pneumonia: RR 0.43 (95% CI: 0.20-0.94); P=0.03
- 301 • Pulmonary oedema: RR 0.22 (95% CI: 0.06-0.78); P=0.02
- 302 • Hospital stay: restrictive groups 2 days less (95% CI: 0.5-3.4); P=0.009
- 303 • Hospital mortality: RR 0.59 (95% CI:0.2-2.0); P=0.40

305 **Figure 1. Mortality**

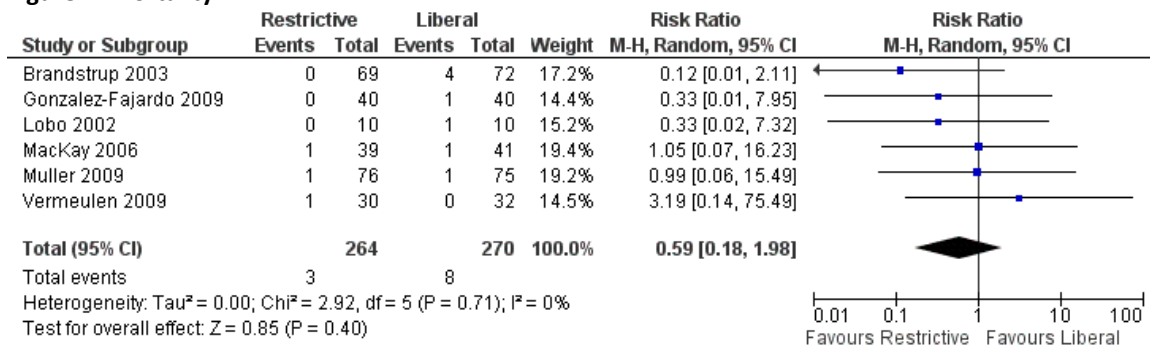

306 Our results show fluid restriction seems very promising and could lead to marked improvements in patient outcomes,  
 307 but a large definitive trial is needed to generate the reliable evidence needed to change practice around the world.  
 308

309 An earlier meta-analysis that included less relevant trials (4) found that the range of 'liberal' IV fluid replacement  
 310 varied from 2,750 to 5,388 ml compared with 998 to 2,740 ml in the 'restrictive' regimen. Like others (3) they noted  
 311 that the fluid regimens and outcomes were inconsistently defined and only two studies reported perioperative care  
 312 principles and discharge criteria. These and others have argued for a carefully designed trial that incorporates such  
 313 details.

### 314 2.2 Crystalloid or Colloid Fluid Resuscitation?

315 Colloid proponents have argued that colloids lessen the risk of oedema because of the higher oncotic pressure, and  
 316 textbooks typically recommend a 3-5 fold ratio of crystalloid to colloid volumes for acute fluid resuscitation. But the  
 317 oncotic pressure effect may be lost if colloids leak and remain in the interstitial spaces. This perhaps explains why  
 318 recent large trials have found that CVP and pulmonary function are comparable with both crystalloids and colloids (31-  
 319 33). The SAFE study found that the volume of crystalloid needed for resuscitation at 24 h was only 1.3-fold larger than  
 320 that of 4% albumin (29). There is concern regarding the safety of colloids (30-33).

321 The weight of evidence downplays the superiority of any particular IV fluid (crystalloid or colloid (29), type of colloid  
 322 (3), or type of crystalloid. The main unresolved question is how much fluid to use, and whether haemodynamic- or  
 323 flow-directed goals provide further benefit. However, in view of emerging evidence suggesting adverse effects of  
 324 starch-based colloid solutions (30, 31), we recommend they NOT be used in this study.

### 325 2.3 Goal-directed Therapy: fluids and/or inotropes

326 CVP is an unreliable measure of intravascular status (32), but remains the most common monitor used to guide fluid  
 327 resuscitation and vasopressor support. Relatively noninvasive monitors such as oesophageal Doppler and pulse  
 328 contour analysis are becoming popular for intraoperative and ICU use (33), and there have been several positive trials  
 329 (34-37), meta-analysis (23, 38), and guidelines (39) supporting their use. The strongest evidence is for oesophageal  
 330 Doppler (39) but the device is infrequently used in Australian practice at present. Goal-directed strategies focus on

337 fluid responsiveness and typically require additional IV fluid supplementation, usually giving an extra 800 ml per case,  
 338 and more postoperatively(23). These findings are hard to resolve when considering the apparent success of fluid  
 339 restriction regimens described above.

340  
 341 One influential trial of ‘optimized’ care in the UK (15) in which 138 high-risk patients undergoing major abdominal  
 342 surgery were randomly assigned to one of 3 groups: control, or ‘pre-optimized’ with either dopexamine or adrenaline.  
 343 The control group remained on the general surgical ward with no preoperative fluid protocol. The intervention groups  
 344 were admitted to the ICU for a minimum of 4 h before surgery, and had full haemodynamic monitoring including PA  
 345 catheter. The two intervention groups were initially fluid optimized with colloid until pulmonary occlusion pressure 12  
 346 mm Hg was reached; red cell transfusion was used for haemoglobin <110 g/L. Patients then received inotrope therapy  
 347 titrated to reach a target DO<sub>2</sub> of 600 ml/min/m<sup>2</sup> for up to 12±24 h after surgery. Hospital mortality in the protocol  
 348 groups was 3%, compared with 17% in the control (P=0.007), and morbidity and hospital stay were significantly  
 349 reduced in the dopexamine group. Interpretation of this study is difficult. It could be said that closer (and more expert)  
 350 care in the ICU, compared with junior doctor-based ward care, was a key factor. Whether the target DO<sub>2</sub> itself,  
 351 inotrope therapy, additional fluids, or the combination of these factors is important is unclear. Two subsequent meta-  
 352 analyses of dopexamine in major surgery had conflicting findings (42, 43), and a recent trial using FloTrac-guided fluid  
 353 supplementation found(40) no effect on complication rate (40).

354  
 355 The most recent meta-analysis (41) of 29 trials involved 4805 patients found pre-emptive perioperative haemodynamic  
 356 intervention significantly reduced mortality, OR 0.48 [95% CI:0.33–0.78]; P<0.0002; and surgical complications, OR 0.43  
 357 [0.34–0.53]; P< 0.0001. That is, supplemental fluids seem to improve outcome. Sub-group analyses showed similar  
 358 effects with each type of intervention, including use of supplemental IV fluids alone:  
 359

| Table 3. Subgroup Analysis for Number of Patients with Complications |                |                 |                                    |                     |
|----------------------------------------------------------------------|----------------|-----------------|------------------------------------|---------------------|
| Subgroup                                                             | No. of studies | No. of patients | No. of patients with complications |                     |
|                                                                      |                |                 | In control group                   | Odds ratio (95% CI) |
| Monitor                                                              |                |                 |                                    |                     |
| ODM                                                                  | 9              | 987             | 163/469 (35%)                      | 0.41 (0.30–0.57)*   |
| PAFC                                                                 | 10             | 1085            | 108/537 (20%)                      | 0.54 (0.33–0.88)*   |
| Other <sup>a</sup>                                                   | 4              | 320             | 76/158 (48%)                       | 0.32 (0.19–0.54)*   |
| Therapy                                                              |                |                 |                                    |                     |
| Fluids                                                               | 9              | 742             | 126/372 (34%)                      | 0.38 (0.26–0.55)*   |
| Fluids and inotropes                                                 | 14             | 1650            | 221/792 (28%)                      | 0.47 (0.35–0.64)*   |
| Goals                                                                |                |                 |                                    |                     |
| CI/DO <sub>2</sub>                                                   | 12             | 982             | 169/461 (37%)                      | 0.52 (0.37–0.74)*   |
| FTc/SV                                                               | 8              | 849             | 135/423 (32%)                      | 0.41 (0.28–0.58)*   |
| Other <sup>a</sup>                                                   | 3              | 561             | 43/280 (15%)                       | 0.26 (0.13–0.52)*   |
| Resuscitation target                                                 |                |                 |                                    |                     |
| Supranormal                                                          | 6              | 469             | 133/227 (59%)                      | 0.42 (0.29–0.63)*   |
| Normal                                                               | 17             | 1923            | 214/937 (23%)                      | 0.43 (0.31–0.60)*   |

360  
 361  
 362 A later trial in 179 patients found no outcome benefit of goal-directed therapy, and possibly longer hospital stay (42).

363  
 364 One of the reasons for the varied results is that the focus should not be on the amount of IV fluid, but the timing and  
 365 individualisation of such therapy. There may be an optimal amount, probably better targeted using a goal-directed  
 366 approach (43).

367  
 368 **2.4 “Fast-track” or “enhanced recovery from surgery” (ERAS) programs**

369 There is a growing interest in facilitating recovery and earlier hospital discharge after colorectal and other abdominal  
 370 surgery (43-45). ERAS programs typically include avoidance of bowel preparation, nasogastric and drain tubes; non-  
 371 opioid analgesia; and promoting early postoperative mobilization and oral nutrition. A randomized trial comparing an  
 372 ERAS program with traditional care in 156 patients undergoing colorectal surgery was stopped early because of  
 373 apparent benefit (44), with less complications (21% vs. 50%, P=0.001) and a shorter hospital stay (5 vs. 9 days,  
 374 P<0.001). A regression analysis revealed excess IV fluids (OR 4.2 [95% CI 1.7–10]; P=0.002) as an independent predictor  
 375 of postoperative complications. A recent meta-analysis of ERAS studies has similarly found a significant reduction in  
 376 complications and hospital stay (44). Most of the above fluid trials did not employ ERAS principles (4), and so we plan  
 377 to include these in our study.

378  
 379 **2.5 Measuring Outcome after Major Abdominal Surgery?**

380 Most of the above-quoted studies pooled a variety of postoperative adverse outcomes into a single composite  
 381 outcome (“complications”), for which there was often an imbalance in severity and duration, and with questionable  
 382 long-term relevance to patients. Composite outcomes can be valid and important but only if properly constructed  
 383 (45). Of course a hard endpoint after surgery is survival, but none of the above studies was sufficiently powered to  
 384 detect a clinically important difference. Mortality is low after most types of surgery (48, 51) and so is an unattractive  
 385 primary endpoint on which to base a sample size calculation.



386  
387  
388  
389  
390  
391  
392  
393  
394  
395  
396  
397  
398  
399  
400  
401  
402  
403  
404  
405  
406  
407  
408  
409  
410

It is unclear which of many adverse postoperative outcomes dominates any other. There is a strong argument to use patient-centred outcome measures. Quality of life is often used, but these instruments were not designed to be responsive after major surgery. Our 40-item quality of recovery score (QoR-40) has undergone psychometric evaluation, including utility and responsiveness testing (46, 47), and has been externally validated and used in many perioperative studies (52-54). But the QoR-40 is designed to measure outcome up to 30 days after surgery. Survival, and avoiding long-term disability, are likely to be the most important and highly valued outcomes for patients undergoing major surgery (55, 56). We thus plan to measure disability-free survival up to 1 year after surgery in this study.

**Interim Long-term Outcome Data for ENIGMA-II and ATACAS trials:** Our experience to date with 1-year follow-up for death/disability (using Katz ADLs) in our two current large international trials across >30 sites (48, 49) has had excellent follow-up, with <1% missing data (24 of 2,570 patients). For noncardiac surgery (n=1800) there have been 242 deaths and 286 with new disability (a combined rate of 31%). This event rate, from a lower risk study population, exceeds our assumptions used in our sample size calculation. Clearly, disability should not be ignored in perioperative outcome trials, and its inclusion can enhance study power.

**2.6 Feasibility: Pilot Study**

To ascertain current practices and support for this trial, we surveyed all members of both ANZCA and ANZICS Trials Groups (n=238) and found that >90% were comfortable with the proposed Group fluid regimens and were interested in participating in the trial (50).

We undertook a feasibility pilot study of the proposed trial at 3 centres. After ethics approval and patient consent, and surgeon, anaesthetist and intensivist support, we have demonstrated that we can successfully implement the fluid regimens both intraoperatively and postoperatively:

| variable                         | Restrictive (n=41) | Liberal (n=41) | P value |
|----------------------------------|--------------------|----------------|---------|
| Age, y                           | 65 ± 12            | 67 ± 12        | -       |
| IV fluid (crystalloid + colloid) |                    |                |         |
| Intraoperative                   | 1746 ± 748         | 2730 ± 1309    | <0.0005 |
| Total at 24 h postoperative      | 3167 ± 1625        | 5133 ± 2138    | <0.0005 |
| Postoperative                    |                    |                |         |
| Haemoglobin, g/L                 | 110 ± 18           | 101 ± 17       | 0.014   |
| Albumin, g/L                     | 31 ± 6.7           | 27 ± 7.0       | 0.030   |
| CRP, mg/L                        | 108 ± 80           | 128 ± 75       | 0.33    |
| Quality of recovery score        | 159 ± 20           | 154 ± 26       | 0.34    |
| Median ICU stay, h               | 0 (0-15)           | 0 (0-19)       | 0.86    |
| Median Hospital stay, days       | 8.1 (5.6-14)       | 8.4 (6.9-16)   | 0.30    |

411  
412  
413  
414  
415  
416  
417  
418

To date there is no evidence of any adverse haemodynamic or renal effects with restrictive therapy (51).

In addition, we are currently undertaking a cohort study of 400 patients undergoing a range of elective surgeries to accurately measure and define rates of comorbidity, wellbeing and disability at 1, 3, 6, and 12 months after surgery. This will validate our follow-up and disability measurement techniques.

419 **3. STUDY DESIGN**

420 **3.1 Experimental design**

421 Large, multicentre, randomized, single blind, pragmatic trial, with patients randomly assigned to either Restrictive or  
422 Liberal fluid, stratified by site and planned HDU/ICU admission.

423

424 This is an effectiveness trial (61, 62) – some elements of the trial are deliberately left to the anaesthetist’s discretion in  
425 order to reflect usual practice and maximise generalisability.

426

427

428 **3.2 Subject Selection**

429

430 **3.2.1 Definition of Disease State**

431 We are targeting patients undergoing planned major abdominal or pelvic surgery that includes a skin incision and  
432 operative duration expected to exceed two hours.

433

434 **3.2.2 Source and Number**

435 We will use similar procedures to those used by us successfully in previous multicentre studies. Simple eligibility  
436 criteria, and research nurse-screening and enrolment, ensure that recruitment is maximized.

437

438 2800 patients in total will be required for this study (1400 in each group).

439

440 **3.2.3 Entrance Criteria**

441

Inclusion criteria:

442

- 443 1. Adults ( $\geq 18$  years) undergoing elective major surgery and providing informed consent
- 444 2. All types of open or lap-assisted abdominal or pelvic surgery with an expected duration of at least 2 hours, and  
445 an expected hospital stay of at least 3 days (for example, oesophagectomy, gastrectomy, pancreatectomy,  
446 colectomy, aortic or aorto-femoral vascular surgery, nephrectomy, cystectomy, open prostatectomy, radical  
447 hysterectomy, and abdominal incisional hernia repair)
- 448 3. At increased risk of postoperative complications, defined as at least one of the following criteria:
  - 449 a) age  $\geq 70$  years
  - 450 b) known or documented history of coronary artery disease
  - 451 c) known or documented history of heart failure
  - 452 d) diabetes currently treated with an oral hypoglycaemic agent and/or insulin
  - 453 e) preoperative serum creatinine  $>200 \mu\text{mol/L}$  ( $>2.8 \text{ mg/dl}$ )
  - 454 f) morbid obesity ( $\text{BMI} \geq 35 \text{ kg/m}^2$ )
  - 455 g) preoperative serum albumin  $<30 \text{ g/L}$
  - 456 h) anaerobic threshold (if done)  $<12 \text{ mL/kg/min}$
  - 457 i) or two or more of the following risk factors:
    - 458 ■ ASA 3 or 4
    - 459 ■ chronic respiratory disease
    - 460 ■ obesity ( $\text{BMI} 30\text{-}35 \text{ kg/m}^2$ )
    - 461 ■ aortic or peripheral vascular disease
    - 462 ■ preoperative haemoglobin  $<100 \text{ g/L}$
    - 463 ■ preoperative serum creatinine  $150\text{-}199 \mu\text{mol/L}$  ( $>1.7 \text{ mg/dl}$ )
    - 464 ■ anaerobic threshold (if done)  $12\text{-}14 \text{ mL/kg/min}$

465

Exclusion criteria:

466

- 467 1. Urgent or time-critical surgery
- 468 2. ASA physical status 5 – such patients are not expected to survive with or without surgery, and their underlying  
469 illness is expected to have an overwhelming effect on outcome (irrespective of fluid therapy)
- 470 3. Chronic renal failure requiring dialysis
- 471 4. Pulmonary or cardiac surgery – different pathophysiology, and thoracic surgery typically have strict fluid  
472 restrictions
- 473 5. Liver resection – most units have strict fluid/CVP limits in place and won’t allow randomisation
- 474 6. Minor or intermediate surgery, such as laparoscopic cholecystectomy, transurethral resection of the prostate,  
475 inguinal hernia repair, splenectomy, closure of colostomy – each of these are typically “minor” surgery with  
476 minimal IV fluid requirements, generally low rates of complications and mostly very good survival.

477  
478  
479  
480

**3.3 Study Procedures**

**3.3.1 General Description**

Study Flow Chart

|                                    | Visit 1                                    | Visit 2                 | Visit 3                  | Visit 4                            | Visit 5             | Visit 6                              | Visit 7                       | Visit 8                       | Visit 9                        |
|------------------------------------|--------------------------------------------|-------------------------|--------------------------|------------------------------------|---------------------|--------------------------------------|-------------------------------|-------------------------------|--------------------------------|
|                                    | Preadmission Clinic/<br>preoperative visit | Day of<br>Surgery       | Post op<br>day 1         | Post op day<br>3                   | Day of<br>discharge | 30 day<br>follow up<br>phone<br>call | 3 month<br>phone<br>follow-up | 6 month<br>phone<br>follow-up | 12 month<br>phone<br>follow-up |
| Entry Criteria                     | x                                          |                         |                          |                                    |                     |                                      |                               |                               |                                |
| Informed<br>Consent                | x or x                                     |                         |                          |                                    |                     |                                      |                               |                               |                                |
| Demographics,<br>Medical History   | x or x                                     |                         |                          |                                    |                     |                                      |                               |                               |                                |
| ECG                                | x or x                                     |                         | x                        | if chest pain or elevated troponin |                     |                                      |                               |                               |                                |
| Randomisation                      |                                            | x                       |                          |                                    |                     |                                      |                               |                               |                                |
| Blood tests<br>Electrolytes        | x or x                                     |                         | x                        | x                                  |                     |                                      |                               |                               |                                |
| Liver function<br>tests            | If clinically indicated                    |                         | If clinically indicated  |                                    |                     |                                      |                               |                               |                                |
| HbA1C                              | Recommended in ALL<br>diabetics            |                         |                          |                                    |                     |                                      |                               |                               |                                |
| CRP                                |                                            |                         |                          | X                                  |                     |                                      |                               |                               |                                |
| Blood tests<br>Troponin<br>Lactate |                                            | If clinically indicated |                          |                                    |                     |                                      |                               |                               |                                |
| IV fluids                          |                                            | x                       | x                        | x                                  |                     |                                      |                               |                               |                                |
| Web-based<br>data entry            |                                            | x                       |                          |                                    | x                   | x                                    | x                             | x                             | x                              |
| Wound<br>inspection                |                                            |                         | If change of<br>dressing | x                                  | x                   | Medical<br>record<br>review          |                               |                               |                                |
| QoR-15                             |                                            |                         | x                        | x                                  |                     | x                                    |                               |                               |                                |
| WHODAS                             | x                                          |                         |                          |                                    |                     | x                                    | x                             | x                             | x                              |
| Adverse Events                     |                                            | x                       | x                        | x                                  |                     | x                                    |                               |                               |                                |

|                       |  |          |          |          |          |          |  |  |     |
|-----------------------|--|----------|----------|----------|----------|----------|--|--|-----|
| <b>Outcomes</b>       |  |          |          |          |          | <b>x</b> |  |  | 481 |
| <b>Blood products</b> |  | <b>x</b> | <b>x</b> | <b>x</b> | <b>x</b> |          |  |  |     |

482 All procedures are based on successful strategies used in each of our previous large multicentre trials. Ethics  
483 Committee approval and informed consent will be obtained at all study centres. After enrolment, on the day of  
484 surgery, patients will be randomly assigned (1:1) to groups via either (both established) 24-hr freecall telephone or  
485 web-based service using a computer-generated code. All other perioperative clinical care will be according to standard  
486 practice. All relevant factors will be recorded on a trial case report form (CRF).  
487

### 488 3.3.2 Perioperative Management

#### 489 Preoperative period

490 ERAS perioperative care principles will be emphasized. All patients will receive prophylactic antibiotics according to  
491 established guidelines. Medications will be continued perioperatively unless or at the clinicians discretion, but we will  
492 recommend withholding ACE-inhibitors and ARBs on the day of surgery. We will record preoperative use of bowel  
493 preparation, fasting times, ERAS data, medications, and biochemistry and haematology results on the CRF.  
494

#### 495 Intraoperative period

496 Choice of anaesthetic agents and perioperative analgesia will be left to the discretion of the anaesthetist; such data will  
497 be recorded. We will emphasize the need to avoid hypothermia (<36 °C). Epidural use will be recorded as this may  
498 increase the risk of hypotension and need for IV fluids (63, 64), but such effects are likely to be small (52). We will  
499 record usage of all “advanced” monitoring devices (CVP, pulse contour analysis, TOE, oesophageal Doppler).  
500

501 The acceptable limits of low BP, and a definition of ‘hypotension’, vary widely (66), though such a definition will be  
502 modified by older age, pre-existing hypertension, and cerebrovascular disease. We will use a general guideline of  
503 systolic BP <90 mmHg for more than 5 mins, but also ask the attending anaesthetist to modify their acceptable lower  
504 limit of sBP at the commencement of surgery, and, according to randomly-assigned group, treat hypotension with  
505 additional IV fluid or vasopressor therapy (see below). For example, in younger patients or those with pre-existing low  
506 BP it may be acceptable to tolerate a sBP of 85-95 mmHg, but in older patients, particularly those with pre-existing  
507 hypertension, a higher lower limit may be required. Such modification to the acceptable lower sBP will be recorded.  
508 For patients managed in a high dependency or ICU environment after surgery, hypotension will be similarly treated for  
509 the first 24 h after surgery.  
510

#### 511 Postoperative period

512 Patients will be followed daily and outcomes will be recorded until discharge. We will recommend that  
513 antihypertensive medications should be withheld until sBP is consistently at or above preoperative levels. Serum  
514 electrolytes, haemoglobin/haematocrit, and a 12-lead ECG will be ordered preoperatively and on day 1 after surgery.  
515 CRP will be measured on postoperative Day 3 and whenever sepsis is suspected (67, 68). Additional laboratory tests  
516 will be ordered if clinically indicated. On day 3 all patients will complete the 15-item quality of recovery score (QoR-15).  
517 On day 30 all patients will be contacted by phone to ascertain if they have experienced any outcomes, and if detected,  
518 further testing will be arranged. Documentation for such events will be sought in the hospital medical record and  
519 doctor’s records. The QoR-15 will be repeated on day 30 along with WHODAS, and the WHODAS will be repeated at 3-,  
520 6- and 12-month follow-up to ascertain survival status and new-onset disability.  
521

### 522 3.3.3 Clinical Observations

#### 523 3.3.3.1 Primary Endpoint

524 Disability-free survival up to 1 year: survival and freedom from new-onset disability, the latter being a persistent (>6  
525 months) reduction in functional status as defined by a 25% (4-point) or greater increase in the 12-item version of  
526 WHODAS to a final score of at least 25% (69, 70). Disability will be assessed by the participant, but if unable then we  
527 will use the proxy’s report. The date of onset of new disability will be recorded. Further details are provided in the  
528 Procedures Manual.  
529

#### 530 3.3.3.2 Secondary Endpoints

531 Secondary endpoints include an *a priori* composite of 30-day mortality or major septic complications (sepsis, surgical  
532 site infection, anastomotic leak (53), and pneumonia), plus each individually, serum lactate (at 6 and 24 h), CRP (Day 3),  
533 pulmonary oedema, blood transfusion, acute kidney injury, ICU and hospital stay, unplanned re-operation, unplanned  
534 admission to ICU, and quality of recovery (QoR-15). We will use the following definitions:  
535

- 536 1. *Death*: all-cause mortality at 90 days, then up to 12 months after surgery
- 537 2. *Death or severe disability* (WHODAS score ≥40) at 12 months after surgery
- 538 3. *Sepsis*: using Centers for Disease Control and Prevention (CDC) with National Healthcare Safety Network (NHSN)  
539 criteria (54): - SIRS plus infection (positive blood culture or purulence from any site)

- 540 4. *Surgical site infection*: if associated with purulent discharge and/or a positive microbial culture  
541 5. *Pneumonia*: typical x-ray appearance and  $\geq 2$  of (i) temperature  $\geq 38$  °C, (ii) WCC  $>12,000$ , and (iii) positive sputum culture  
542 6. *Acute kidney injury*: defined by RIFLE criteria, but not urine output – at least 2-fold increase in creatinine, or GFR  
543 decrease  $>50\%$  (55); plus renal replacement therapy up to 90 days after surgery  
544 7. *Pulmonary oedema*: respiratory distress or impaired oxygenation AND radiological evidence of pulmonary oedema  
545 8. *Duration of mechanical ventilation*: additive for all episodes up to 90 days after surgery  
546 9. *Total ICU stay*: including initial ICU admission and readmission times  
547 10. *Hospital stay*: from the start (date, time) of surgery until actual hospital discharge  
548 11. *Quality of recovery*: QoR-15 score (52, 73) on days 1, 3, and 30.  
549

#### 550 **Fluid Therapy and Blood Transfusion: General Guidelines**

551 Excessive fluid resuscitation can cause haemodilution (56) and dilutional coagulopathy, and this may increase the need  
552 for red cell and other blood transfusion (29). Blood transfusion is, of itself, associated with increased rates of sepsis  
553 and other postoperative complications (24, 25). All patients will have the same red cell transfusion trigger of 70 g/L,  
554 but this can be modified after assessment of cardiovascular risk (57, 58) or concern for active bleeding. Normal Saline,  
555 containing 154 mmol of sodium and 154 mmol of chloride per litre, is non-physiological and can lead to  
556 hyperchloraemic acidosis (59) and perhaps poorer outcome (60, 61). We will use a balanced salt solution as the  
557 routine fluid therapy in this study. The questionable value of urine output as a measure of kidney or other tissue  
558 perfusion will be emphasized (62).  
559

560 Our study Group fluid regimens are aimed at distinct volume differences and according to recent recommendations (4,  
561 69). The group-assigned fluid regimens will continue for at least 24 hours after surgery, or until cessation of IV fluid  
562 therapy (whichever occurs first). If the patient's clinical condition warrants modification to the type or rate of fluid  
563 administration, then such modifications can be made immediately. This does NOT imply that the patient is removed  
564 from the trial because we will analyze according to the intention-to-treat principle, but we will collect such data for  
565 secondary per-protocol and sensitivity analyses.  
566

#### 567 **Management of Oliguria**

568 It is a normal response of the body to attempt to conserve fluid in times of physiological stress. Oliguria (low urine  
569 output) is part of this homeostatic mechanism; there is no evidence it is harmful in the short term (first 24-48 h after  
570 surgery is common and not abnormal) (62). Nor is there any evidence that diuretics protect against AKI (63). We will  
571 however provide guidance to ward medical and nursing staff (see Procedures Manual).  
572

### 574 **4. Experimental control**

#### 575 **4.1 Group assignment**

576 This will be a large, randomized, parallel-group, controlled trial. After stratification by centre and planned ICU/HDU  
577 admission (or not), patients will be randomly assigned from a computer-generated list (1:1) to either a Restrictive or  
578 Liberal fluid Group.  
579

580 A 24-hr interactive voice recognition system (IVRS) will be available. An alternative web-based randomisation service  
581 will also be available during the conduct of the trial.  
582

583 This is an intention to treat trial. Any participant who is randomised will be followed for the duration of the trial  
584 (unless they withdraw consent) even if they are withdrawn from the active phase of the trial. Patients who do not  
585 complete the active phase of the study will not be replaced.  
586

#### 588 **Liberal Protocol**

589 The Liberal protocol group reflects common contemporary practices in Australia (31, 80)(76), and is consistent with  
590 previous international trials (21, 25, 78) – see Appendix. At the commencement of surgery a bolus of Hartmann's  
591 balanced salt or Ringer's lactate crystalloid 10 ml/kg followed by 8 ml/kg/h will be administered until the end of  
592 surgery – the latter can be further down-titrated after 4 hours if clinically indicated. Important: for the purposes of  
593 calculations of bolus and maintenance fluids in patients exceeding 100 kg, the maximal body weight will be set at 100  
594 kg. A maintenance infusion will then continue at 1.5 ml/kg/h, for at least 24 hours, but this can be reduced  
595 postoperatively if there is evidence of fluid overload and no hypotension, and increased if there is evidence of  
596 hypovolaemia or hypotension. Alternative fluid types (crystalloid, dextrose, colloid) and electrolyte supplements will  
597 be allowed postoperatively in order to account for local preferences and patient biochemistry, for which we will collect  
598 data. For a 75-kg adult, the intraoperative volume (for a 4 h operation) will be 3150 ml (+colloid/blood replacement

599 for blood loss), and then around 2700 ml per day. That is, the first (intraoperative + postoperative) 24-h fluid  
 600 administration will be about 5400 ml (P.T.O).

601  
 602  
 603 **Restrictive Protocol**

604 The Restrictive protocol group is designed to provide less than 2.0 L water and 120 mmol sodium per day. Induction of  
 605 anaesthesia will be accompanied by an IV fluid bolus limited to  $\leq 5$  ml/kg; no other IV fluids will be used at the  
 606 commencement of surgery (unless indicated by goal-directed device [see below]). Important: for the purposes of  
 607 calculations of bolus and maintenance fluids in patients exceeding 100 kg, the maximal body weight will be set at 100  
 608 kg. Hartmann's balanced salt or Ringer's lactate crystalloid 5 ml/kg/h will be administered until the end of surgery, and  
 609 bolus colloid/blood used intraoperatively to replace blood loss (ml for ml); then an infusion at 0.8 ml/kg/h until  
 610 expedited cessation of IV fluid therapy within 24 hours. The rate of postoperative fluid replacement can be reduced if  
 611 there is evidence of fluid overload and no hypotension, and can be increased if there is hypotension AND evidence of  
 612 hypovolaemia. For a 75-kg patient and 4 h operation, intraoperative fluid volume will be 1875 ml (+colloid/blood  
 613 replacement for blood loss). The first 24-h fluid administration will be around half that of the liberal group.  
 614

615  
 616  
 617 Hypoten... restricted with fluid boluses in the liberal protocol group, and with a v...  
 618 restrictive protocol group. The latter will consist of metaraminol or phenylephrine bolus/infusion and/or noradrenaline  
 619 infusion during surgery, and a noradrenaline infusion postoperatively if in a HDU or ICU environment. The lower limit  
 620 of acceptable sBP in the restrictive group can be further reduced by the attending anaesthetist or intensivist in order to  
 621 limit fluid... ally unnecessary inotropic support (as per above). We have la...  
 622 flowchar... and postoperative (ward or ICU/HDU) medical and nursing staf...  
 623 patients... staff will be present at or soon after all handover steps, and be contactable at all  
 624 hours.  
 625

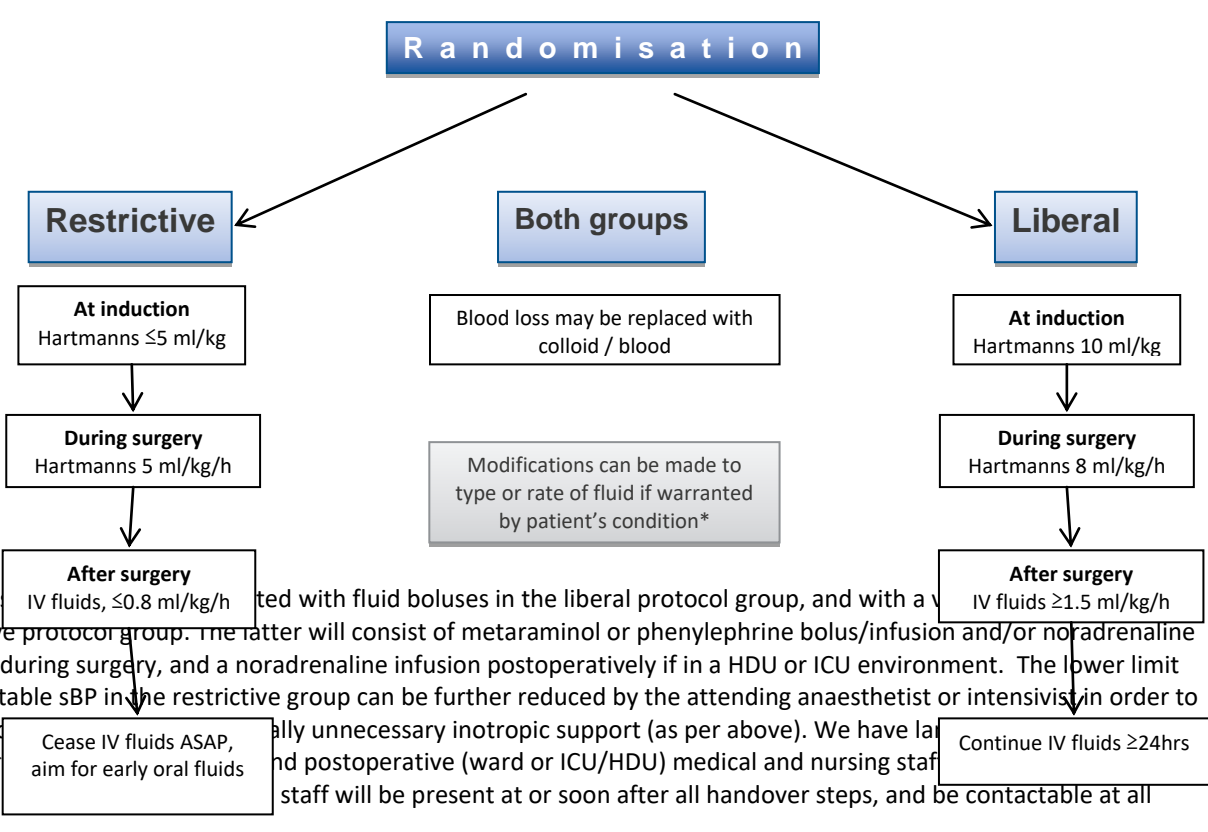

626 **Total fluid in first 24 h for 75 kg adult undergoing 4 h operation**

627  
 628 **4.2 Goal-directed Therapy**

629 For anaest... g advanced monitoring (eg. CVP or goal-directed device), we allow additi... fluid  
 630 supplement...  $\leq 3000$  ml... a haemodynamic target. It is likely to lead to additional colloid admin...  $\geq 5400$ ...  
 631 and after surgery (3, 4, 40). Some hospitals use pulse contour analysis to direct perioperative or ICU fluid therapy in surgical  
 632 patients, and some use oesophageal Doppler. Most rely upon conventional monitoring (HR, BP, urine output). We plan  
 633 to test the effectiveness of each approach according to their local availability and use. The statistical analysis will focus  
 634 on a test for interaction, to determine whether the effects of a fluid regimen work differently in those with and  
 635 without any advanced monitoring. We anticipate that more than half will use (only) clinical measures.  
 636

637 For each of the goal-directed techniques, pulse/stroke volume variation or FTc will be measured before  
 638 commencement of surgery and repeated at regular (say, 10-30 min) intervals intraoperatively. For those in the liberal  
 639 protocol group, goal-directed therapy can continue postoperatively at 4 hourly intervals, for up to 24 hours after

640 surgery. If there is evidence of fluid responsiveness (eg. systolic pressure/volume variation of  $\geq 13\%$  (77)) at any of  
 641 these times then IV colloid or crystalloid 3-5 ml/kg can be given. Such data will be collected on the CRF.  
 642

| Colloid* (recommended) or crystalloid (3 ml/kg)                                                                                                           | Liberal                   | Restrictive                            |
|-----------------------------------------------------------------------------------------------------------------------------------------------------------|---------------------------|----------------------------------------|
| Colloid/blood (using a transfusion threshold) bolus <i>if acute bleeding</i>                                                                              | Yes                       | Yes                                    |
| <i>If normotensive but monitoring suggests hypovolaemia (eg. low CVP or oliguria)</i>                                                                     | Yes                       | No                                     |
| <i>If normotensive but goal-directed device suggests hypovolaemia (eg. FTc &lt;0.33, <math>\Delta SV \geq 10\%</math>, or <math>SVV \geq 13\%</math>)</i> | Yes                       | Consider                               |
| <i>If hypotensive (1) and hypovolaemia</i>                                                                                                                | Colloid*                  | Colloid* (but limit) + vasoconstrictor |
| <i>(2) but not hypovolaemic</i>                                                                                                                           | Colloid* $\pm$ vasoactive | vasoactive therapy                     |

\* starch-based colloids are not recommended (30, 31)

643  
644  
645  
646

#### 4.3 Blinding Procedure

647 Patients will be blinded to Group allocation. Anaesthetists, surgeons, and intensivists will have knowledge of Group  
 648 identity. Similarly, it is expected that other surgical and nursing staff, and research staff conducting the in-hospital daily  
 649 reviews, cannot be properly blinded to Group identity. But research staff conducting 1-12 mth follow-ups MUST be  
 650 blinded to Group allocation.

651  
652

#### 4.4 Case Report Forms

653 For each form on which information is entered, the patient's initials, allocation number and the date of the visit must  
 654 be entered in the appropriate space. The CRFs must be neatly handwritten with a black-ink ballpoint pen. Errors must  
 655 be corrected by drawing a single line through the incorrect entry and writing in the new value positioned as close to  
 656 the original as possible.

657  
658

659 The correction must then be initialled and dated by the authorised individual making the change. Do not obliterate,  
 660 write over, or erase the original entry when making a correction.

661  
662

663 Case report forms should be opened as soon as possible following the start of screening and kept up to date as the  
 664 patient continues the study.

665  
666

667 As soon as possible after the end of each patient's participation in the study the CRF must be completed. All centres  
 668 must store the paper based CRF according to GCP/ICP guidelines.

669  
670

#### 4.5 Web-based data entry

671 Following completion of the paper-based CRF, data will need to be entered by research staff to the database through a  
 672 web-based data entry system. Further information can be found in the Procedures Manual. The system will audit the  
 673 timeliness of data entry and reports will be generated the data monitoring committee regularly.

674  
675

#### 4.6 Data Base Production and Verification

676 Study data will be collected via the internet, monitored by the trial data management centre where all data fields are  
 677 checked and automatically downloaded onto a database. At the end of the trial site-specific data will be sent to each  
 678 site investigator on a CD, for long-term storage.

679  
680

681 Study data will be collected in a paper based CRF, for transcription onto a web-database. We will maximize data quality  
 682 and protocol standardization by arranging a start-up meeting at local scientific meetings or live streamed web based  
 683 sessions, and will provide regular feedback to each centre via phone and the trial web-site, along with a monthly  
 newsletter. A complete procedures manual will be produced. All study personnel will have 24-h access to the study  
 coordinating centre to resolve any questions that arise. Further information can be found in the Procedures Manual.

683



684  
685  
686  
687  
688  
689  
690  
691  
692  
693  
694  
695  
696  
697  
698  
699  
700  
701  
702  
703  
704  
705  
706  
707  
708  
709  
710  
711  
712  
713  
714  
715  
716  
717  
718  
719  
720  
721  
722  
723  
724  
725  
726  
727  
728  
729  
730  
731  
732  
733  
734  
735  
736  
737  
738  
739  
740  
741  
742

#### 4.7 Compliance Checks

Random audits of centres will be undertaken, to access the accuracy and legitimacy of the trial data. Statistical monitoring of the data completeness, data variance, and risk-appropriate endpoint rates will be done for all patient data.

#### 4.8 Patient Completion/Withdrawal

All participants who are randomised will and undergo GA for surgery must be followed for the duration of the study (unless they withdraw consent) even if they are withdrawn from the active phase of the trial.

#### 4.9 Repeat and Special Laboratory Tests

Serum electrolytes, haemoglobin/haematocrit, and a 12 lead ECG will be ordered preoperatively and if clinically indicated after surgery. All diabetics should have their HbA1C measured before surgery. Further tests will be ordered if clinically indicated.

#### 4.10 Adverse Experiences

Serious adverse effects, serious adverse reactions, or suspected unexpected serious adverse reactions (SUSARs) are serious adverse events judged to be related to therapy.

At each visit/assessment, all adverse experiences either observed by the investigator or one of the clinical staff, or reported by the patient spontaneously or in response to a direct question will be evaluated by the investigator and noted in the adverse experience section of the patient's CRF. The nature of each experience, time of onset after surgery, duration, severity and relationship to treatment will be established. Any corrective treatment should be recorded on the appropriate pages of the CRF.

Adverse events should be documented at each assessment point throughout the study. Maximum intensity should be assigned to one of the following categories:

Mild - an adverse event which is easily tolerated by the patient, causing minimal discomfort and not interfering with everyday activities.

Moderate - an adverse event which is sufficiently discomforting to interfere with normal everyday activities.

Severe - an adverse event which is incapacitating and prevents normal everyday activities and/or requires therapeutic intervention (i.e. use of a prescription drug or hospitalisation).

Any serious adverse event should be reported by the local site investigator or research assistant within 24 hours by telephone or email to the local site investigator. Note that study endpoints do not need to be included as serious adverse events.

A preliminary telephone report should be followed by a full report which includes copies of relevant hospital case records, autopsy reports and other documents, where applicable.

A serious adverse experience is defined as any event which is fatal, life-threatening, permanently disabling or incapacitating or results in hospitalisation, prolongs a hospital stay or is associated with congenital abnormality, carcinoma or overdose.

Life threatening means that the patient was at immediate risk of death from the event as it occurred, ie. it does not include a reaction that, had it occurred in a more serious form, might have caused death. For example, drug induced hepatitis that resolved without evidence of hepatic failure would not be considered life threatening, even though drug induced hepatitis can be fatal.

Permanent disability means a permanent and substantial disruption of a patient's ability to carry out normal life functions.

More details for Adverse Event reporting will be found in the procedures manual.

743  
744  
745  
746  
747  
748  
749  
750  
751  
752  
753  
754  
755  
756  
757  
758  
759  
760  
761  
762  
763  
764  
765  
766  
767  
768  
769  
770  
771  
772  
773  
774  
775  
776  
777  
778  
779  
780  
781  
782  
783  
784  
785  
786  
787  
788  
789  
790  
791  
792  
793  
794  
795  
796  
797  
798  
799  
800  
801

## **5. BIAS CONTROL**

This is a large trial, randomised with permuted blocks (by centre and ICU). Anaesthetists, surgeons, and intensivists will have knowledge of Group identity. Similarly, it is expected that other surgical and nursing staff, and research staff conducting the in-hospital daily reviews, cannot be properly blinded to Group identity. But research staff conducting Day 3, 1-12 mth follow-ups MUST be blinded to Group allocation. Secondary outcomes are clearly defined in the protocol; disputes will be resolved by blinded assessors (endpoint adjudication committee).

## **6. SAMPLE SIZE AND STATISTICAL ANALYSIS**

All statistical analysis will be overseen by Prof Andrew Forbes, Monash University Department of Epidemiology and Preventive Medicine. The intention-to-treat population will include all patients randomly assigned to groups AND undergoing induction of anaesthesia.

Our sample size calculation is based primarily on our own data and other published studies. Our ENIGMA-II trial (n>5000 enrolled to date), with a lower risk study population, has a disability-free survival rate of 70% (15% mortality, 15% new disability) at 1 year after surgery). The most recent large data comes from the UK, where the 1-year mortality for open colorectal surgery was 17% in the 31,847 patients with pre-existing comorbidity (64). Reductions in serious complication rates have exceeded 25% in pooled analyses of similar studies (3, 76), and pre-existing major comorbidity increases mortality risk up to 16-fold (65). Using a type I error of 0.05 and survival analysis, with an expected one year disability-free survival probability of 65% (66) and a hazard ratio of  $\geq 1.25$ , 1300 patients in each group will provide 90% power. Target recruitment will be set at 2800 patients to account for losses due to follow-up.

Analyses will be intention-to-treat. For analysis of the composite death-disability endpoint, we will use the Cox proportional hazards regression model; for secondary functional outcome (WHODAS), we will use ordinal logistic regression. Both analyses will be adjusted for age and ASA physical status. Incidence proportions for binary outcomes will be analyzed using chisquared tests, with covariate adjustment done using log-binomial regression. Results will be expressed with risk ratios and 95% CI. Other secondary endpoints will be compared with rank sum and/or t-tests as appropriate.

Planned sub-group analyses will assess patient sex, age groups, bowel surgery, and use of monitoring devices (including goal-directed techniques). For these we will undertake tests for interaction by adding terms to the regression models.

## **7. INTERIM ANALYSIS**

Interim analyses will consider the defined study endpoints, but include a specific consideration of 90-day mortality (because the primary endpoint is not finalised until 1 year after study entry) after enrolment of 1000 and 2000 patients, adjusted according to the O'Brien and Fleming method. Results will be made available to the Data and Safety Monitoring Committee.

## **8. SECONDARY ANALYSIS**

We plan several substudies (to be funded from other sources), each of which will have a separate protocol and authorship plan (using an expanded list of contributors). Additional blood tests and other investigations will be done at selected hospitals according to local interest and expertise.

- 8.1** Cost-effectiveness, to include hospital stay and complications as we have done previously (67)
- 8.2** Hyperchloraemic acidosis (to measure strong ion difference, Cl-, lactate, albumin)
- 8.3** Pulmonary oedema (to measure FiO<sub>2</sub>/PaO<sub>2</sub> ratio, CT/CXR-confirmed atelectasis)
- 8.4** Coagulopathy (to measure blood loss, platelet count, fibrinogen, INR, APTT, Hb flux, transfusion)
- 8.5** Sepsis (to measure fever, WCC, CRP and possibly other biomarkers)
- 8.6** AKI and hepatic injury
- 8.7** Postoperative cognitive deficit
- 8.8** Feeding and return of bowel function
- 8.9** Wound healing and anastomotic leak
- 8.10** Late cancer recurrence.

## **9. PERSONNEL RESPONSIBILITIES**

802  
803  
804  
805  
806  
807  
808  
809  
810  
811  
812  
813  
814  
815  
816  
817  
818  
819  
820  
821  
822  
823  
824  
825  
826  
827  
828  
829  
830  
831  
832  
833  
834  
835  
836  
837  
838  
839  
840  
841  
842  
843  
844  
845  
846  
847  
848  
849  
850  
851  
852  
853  
854  
855

### **9.1 Investigators**

The Steering Committee will consist of the principal investigator (PSM [Chair]), and other clinician-researchers in anaesthesia, surgery and intensive care medicine, plus the trial statistician – see below.

Each site investigator must ensure that all staff conducting the study are qualified to do so.

Each site investigator must submit the study protocol to the Ethics Committee or equivalent regulatory body and obtain approval prior to commencing the study.

Each site investigator must ensure that all staff involved with the study are fully instructed on the study procedures and are given access to the study protocol and other information relating to the study.

Each site investigator must ensure that the study is conducted in accordance with this protocol, ICH GCP notes for Guidance on Good Clinical Practice (CPMP/ICH/135/95) and in Australia with the NHMRC National Statement on Ethical Conduct in Research Involving Humans.

It is each site investigator's responsibility to ensure that written, informed consent is obtained from each patient prior to entering the study.

Each site investigator must ensure that the web-based CRFs are complete and accurate on completion of the study. Each site investigator will ensure that the quality control procedures are performed on both the CRFs and the data base.

It is the principal investigator's responsibility, in conjunction with the chief investigators, to write the Study Report at the completion of the study. Authorship guidelines are described in Section 11.

### **9.2 Monitor**

Not applicable.

### **9.3 Sponsor**

Alfred Health, as an investigator initiated study.

### **9.4 Steering Committee**

The steering committee will include Paul Myles (chair), Rinaldo Bellomo, Tomas Corcoran, Chris Christophi, Andrew Forbes, Phil Peyton, David Story, Andrew Davies, Kate Leslie, Jonathan Serpell, and Sophie Wallace (trial manager)

### **9.5 Endpoint Adjudication Committee (EAC)**

Confirmation reports of all detected outcomes will be de-identified and re-labelled with study number. The committee will consist of experienced perioperative physicians. Details are provided in the Procedures Manual. Their role will be to resolve any uncertainty as to any of the above outcomes: additional advice can be sought by consultation with sub-specialists.

## **10. DATA SAFETY MONITORING COMMITTEE**

The committee consists of Prof Monty Mythen (Chair, *intensivist*, Smiths Medical Professor of Anaesthesia & Critical Care, University College London (UK); Co-Director, Surgical Outcomes Research Centre), Prof Russell Gruen (*surgeon*, Professor of Surgery and Public Health, The Alfred & Monash University Director, National Trauma Research Institute; Melbourne), Prof John McNeil (*epidemiologist and triallist*, Professor of Epidemiology and Preventive Medicine; Head, School of Applied Clinical and Public Health Sciences; Monash University), Prof Guy Ludbrook (*anaesthetist*, Professor of Anaesthesia, Flinders University), and Dr Katherine Lee (*independent statistician*, MCRI).

The DMSC will discuss the interim results and vote for continuation or stopping the trial. A majority vote to stop the trial will be communicated to the Steering Committee at the Trial Coordinating Centre according to predetermined stopping rules (as above) and consideration of other relevant evidence. Their conduct is to be guided by the paper by DeMets et al. (81). Further details are provided in the DSMC charter.

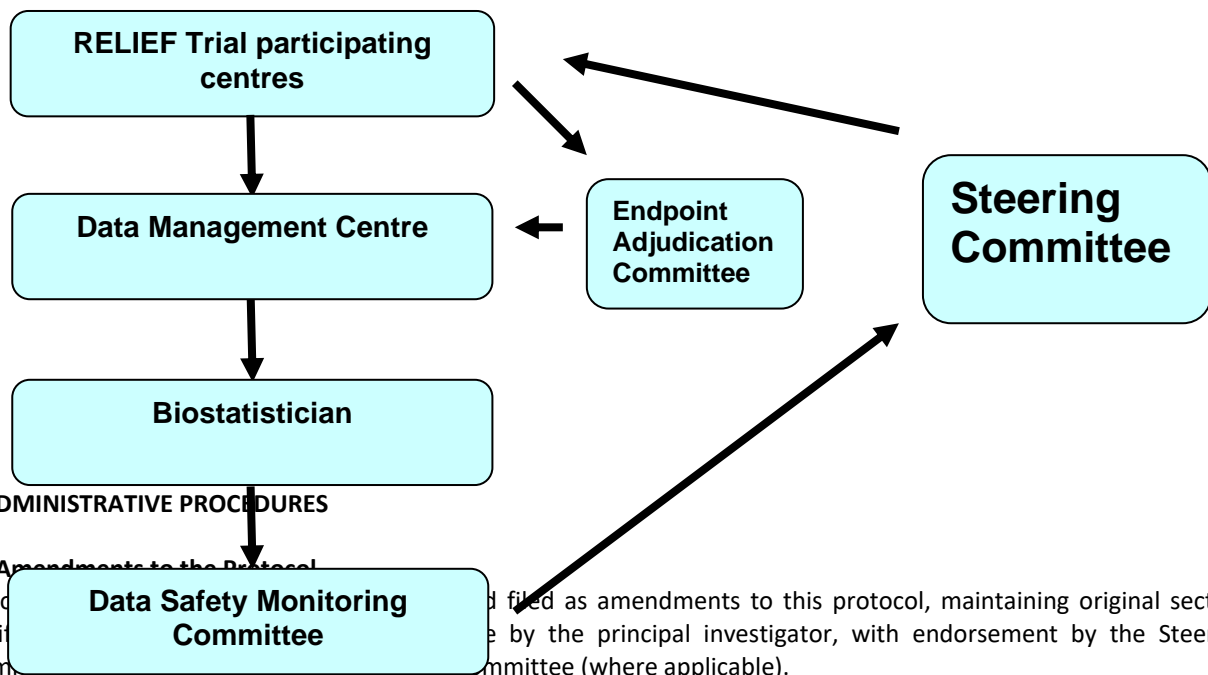

856  
857  
858  
859  
860  
861  
862  
863  
864

**11. ADMINISTRATIVE PROCEDURES**

**11.1 Amendments to the Protocol**

All modifications to the protocol must be filed as amendments to this protocol, maintaining original section identification by the principal investigator, with endorsement by the Steering Committee (where applicable).

Any modifications to the study will be applied for all subsequent patients

**11.2 Early Termination or Extension of the Study**

The investigator (with Ethics Committee approval) may discontinue or extend the study at any time.

**11.3 Confidentiality/Publication of Study Results**

Interim and preliminary results should not be discussed or presented outside the Trial Group, unless authorised by the chair of the Trial Steering Committee. The investigators plan to publish the results in a peer-reviewed journal.

**11.4 Retention of Records**

All CRFs and all other documents associated with this study must be archived for at least 7 years following the completion of the trial, in accordance with TGA requirements.

**11.5 Audits**

For the purpose of compliance with ICH GCP notes for Guidance on Good Clinical Practice (CPMP/ICH/135/95), it may be necessary for a regulatory agency to conduct a site audit.

Random audits may be conducted throughout the trial at the discretion of the Trial Steering Committee.

**12. ETHICAL PROCEDURES**

**12.1 Guidelines for Good Clinical Practice**

This study is to be performed in accordance with ICH GCP notes for Guidance on Good Clinical Practice (CPMP/ICH/135/95).

**12.2 Precautionary Advice**

None specifically required.

**12.3 Participant Information Sheet and Consent Form**

The investigator or delegate will explain the study verbally to the patient. The patient will then be given a copy of the PI&CF and given an opportunity to read it and ask any questions of the investigator. The patient will be encouraged to obtain additional information about the study from an independent source. Once the patient is satisfied with the information they have received, has had an opportunity to ask questions and obtain additional information, and the

890  
891  
892  
893  
894  
895  
896  
897  
898

899 investigator is satisfied that the patient truly understands the nature of the study, the patient will be asked to sign the  
900 consent form.

901  
902 The signing of the consent form must take place in front of a witness and that witness must also be satisfied that the  
903 patient has a good understanding of the study. Each patient's signed consent form will be retained by the investigator.

904  
905 Patients will be advised that they are free to refuse to participate in, or to withdraw from the study at any time. The  
906 medical care provided will not be affected by agreement or refusal to participate in this study. The original Consent  
907 Form for each subject will be stored in the Investigators file and a copy of the consent form will be placed in the  
908 patient's medical record.

909  
910 **12.4 Ethics Committee**

911 This protocol will be submitted to the Ethics Committee (or relevant regulatory body) at each site and their approval  
912 obtained.

913

914 **13. AUTHORSHIP PLAN**

915  
916  
917  
918  
919  
920  
921  
922  
923  
924  
925  
926  
927  
928  
929  
930  
931  
932  
933  
934  
935  
936  
937  
938  
939  
940  
941  
942  
943  
944  
945  
946  
947  
948  
949  
950  
951  
952  
953  
954  
955  
956  
957  
958  
959  
960  
961  
962

**RELIEF Trial  
Authorship & Agreement**

**Target Journal:** Lancet, New England Journal of Medicine, or JAMA

**Planned Authorship:** *The RELIEF Trial Investigators*

The trial will be described as a collaboration of the Australian and New Zealand College of Anaesthetists (ANZCA) Trials Group and the Australian and New Zealand Intensive Care Society (ANZICS) Clinical Trials Group.

The planned writing committee will include Paul Myles, Rinaldo Bellomo, Tomas Corcoran, Andrew Forbes, Philip Peyton, David Story, Chris Christophi, Andrew Davies, Kate Leslie, and Jonathan Serpell. This list may be extended or altered, according to a majority vote of the Trial Steering Committee.

Committee members and Site investigators at centres recruiting more than 250 patients will be offered co-authorship on at least one of the secondary publications. A more extensive participation and higher rate of patient enrolment may support a claim for authorship on the main publication (above), subject to a majority vote of the Trial Steering Committee.

Following acceptance for publication, all co-investigators (site investigators at each centre) can have access to all trial data if they would like to plan secondary analysis (and follow-up publication or presentation). A separate protocol should be developed and will require approval by the Trial Steering Committee before the presentation is made or submitted for publication.

An **Authorship Agreement** document will be produced before commencement of the trial, and all site investigators will be asked to sign their acknowledgement of this.

All site investigators listed in the appendix of the final publication(s) can be considered an author and so can list the publication(s) on their CVs.

**Agreement to Participation**

I have read the trial protocol and agree to conduct the study according to the procedures outlined, and in accordance with Good Clinical Research Practice (GCRP) guidelines. Any information related to this trial will be kept confidential until publication or presentation at a scientific meeting. I have read and accept the proposed authorship plan.

Site Coordinator (print): .....

Signature: ..... Date: ...../...../.....

- 964 1. Myles P, Leslie K. Anaesthesia for major abdominal and urological surgery. Evidence-based  
965 Anaesthesia and Intensive Care [textbook] In: Møller A, Pederson T (eds). 2006:223-46.
- 966 2. SIGN. Postoperative management in adults. A practical guide to postoperative care for  
967 clinical staff. Scottish Intercollegiate Guidelines Network (SIGN). [Guideline]. 2004;77.
- 968 3. Rahbari NN, Zimmermann JB, Schmidt T, Koch M, Weigand MA, Weitz J. Meta-analysis of  
969 standard, restrictive and supplemental fluid administration in colorectal surgery. *Br J Surg*. 2009  
970 Apr;96(4):331-41.
- 971 4. Bundgaard-Nielsen M, Secher NH, Kehlet H. 'Liberal' vs. 'restrictive' perioperative fluid  
972 therapy--a critical assessment of the evidence. *Acta Anaesthesiol Scand*. 2009 Aug;53(7):843-51.
- 973 5. Chong PC, Greco EF, Stothart D, Maziak DE, Sundaresan S, Shamji FM, et al. Substantial  
974 variation of both opinions and practice regarding perioperative fluid resuscitation. *Can J Surg*. 2009  
975 Jun;52(3):207-14.
- 976 6. Hannemann P, Lassen K, Hausel J, Nimmo S, Ljungqvist O, Nygren J, et al. Patterns in  
977 current anaesthesiological peri-operative practice for colonic resections: a survey in five northern-  
978 European countries. *Acta Anaesthesiol Scand*. 2006 Oct;50(9):1152-60.
- 979 7. Weiser TG, Regenbogen SE, Thompson KD, Haynes AB, Lipsitz SR, Berry WR, et al. An  
980 estimation of the global volume of surgery: a modelling strategy based on available data. *Lancet*.  
981 2008 Jul 12;372(9633):139-44.
- 982 8. Australian Institute of Health and Welfare A. Australian hospital statistics 2007-08. 2009.
- 983 9. Shires T, Williams J, Brown F. Acute change in extracellular fluids associated with major  
984 surgical procedures. *Ann Surg*. 1961 Nov;154:803-10.
- 985 10. Arkilic CF, Taguchi A, Sharma N, Ratnaraj J, Sessler DI, Read TE, et al. Supplemental  
986 perioperative fluid administration increases tissue oxygen pressure. *Surgery*. 2003 Jan;133(1):49-55.
- 987 11. Mythen MG, Webb AR. The role of gut mucosal hypoperfusion in the pathogenesis of post-  
988 operative organ dysfunction. *Intensive Care Med*. 1994;20(3):203-9.
- 989 12. Davies SJ, Wilson RJ. Preoperative optimization of the high-risk surgical patient. *Br J*  
990 *Anaesth*. 2004 Jul;93(1):121-8.
- 991 13. Holte K, Klarskov B, Christensen DS, Lund C, Nielsen KG, Bie P, et al. Liberal versus  
992 restrictive fluid administration to improve recovery after laparoscopic cholecystectomy: a  
993 randomized, double-blind study. *Ann Surg*. 2004 Nov;240(5):892-9.
- 994 14. Boyd O, Grounds RM, Bennett ED. A randomized clinical trial of the effect of deliberate  
995 perioperative increase of oxygen delivery on mortality in high-risk surgical patients. *JAMA*. 1993  
996 Dec 8;270(22):2699-707.
- 997 15. Wilson J, Woods I, Fawcett J, Whall R, Dibb W, Morris C, et al. Reducing the risk of major  
998 elective surgery: randomised controlled trial of preoperative optimisation of oxygen delivery. *BMJ*.  
999 1999 Apr 24;318(7191):1099-103.
- 1000 16. Arieff AI. Fatal postoperative pulmonary edema: pathogenesis and literature review. *Chest*.  
1001 1999 May;115(5):1371-7.
- 1002 17. Ruttman TG, James MF, Aronson I. In vivo investigation into the effects of haemodilution  
1003 with hydroxyethyl starch (200/0.5) and normal saline on coagulation. *Br J Anaesth*. 1998  
1004 May;80(5):612-6.
- 1005 18. Ratner AJ, Lysenko ES, Paul MN, Weiser JN. Synergistic proinflammatory responses  
1006 induced by polymicrobial colonization of epithelial surfaces. *Proc Natl Acad Sci U S A*. 2005 Mar  
1007 1;102(9):3429-34.
- 1008 19. Lang K, Boldt J, Suttner S, Haisch G. Colloids versus crystalloids and tissue oxygen tension  
1009 in patients undergoing major abdominal surgery. *Anesth Analg*. 2001 Aug;93(2):405-9, 3rd contents  
1010 page.
- 1011 20. Lassen K, Soop M, Nygren J, Cox PB, Hendry PO, Spies C, et al. Consensus review of  
1012 optimal perioperative care in colorectal surgery: Enhanced Recovery After Surgery (ERAS) Group  
1013 recommendations. *Arch Surg*. 2009 Oct;144(10):961-9.

- 1014 21. Lobo DN, Bostock KA, Neal KR, Perkins AC, Rowlands BJ, Allison SP. Effect of salt and  
1015 water balance on recovery of gastrointestinal function after elective colonic resection: a randomised  
1016 controlled trial. *Lancet*. 2002 May 25;359(9320):1812-8.
- 1017 22. Tambyraja AL, Sengupta F, MacGregor AB, Bartolo DC, Fearon KC. Patterns and clinical  
1018 outcomes associated with routine intravenous sodium and fluid administration after colorectal  
1019 resection. *World J Surg*. 2004 Oct;28(10):1046-51; discussion 51-2.
- 1020 23. Corcoran TR, JEJ. Clarke, S. Myles, PS. Oh, KM. Perioperative fluid management strategies  
1021 in major surgery: a stratified meta-analysis. under peer review. 2011.
- 1022 24. Rahbari NN, Zimmermann JB, Schmidt T, Koch M, Weigand MA, Weitz J. Meta-analysis of  
1023 standard, restrictive and supplemental fluid administration in colorectal surgery. *British Journal of*  
1024 *Surgery*. 2009;96(4):331-41.
- 1025 25. Nisanevich V, Felsenstein I, Almogy G, Weissman C, Einav S, Matot I. Effect of  
1026 intraoperative fluid management on outcome after intraabdominal surgery. *Anesthesiology*. 2005  
1027 Jul;103(1):25-32.
- 1028 26. Kabon B, Akca O, Taguchi A, Nagele A, Jebadurai R, Arkilic CF, et al. Supplemental  
1029 intravenous crystalloid administration does not reduce the risk of surgical wound infection. *Anesth*  
1030 *Analg*. 2005 Nov;101(5):1546-53.
- 1031 27. MacKay G, Fearon K, McConnachie A, Serpell MG, Molloy RG, O'Dwyer PJ. Randomized  
1032 clinical trial of the effect of postoperative intravenous fluid restriction on recovery after elective  
1033 colorectal surgery. *Br J Surg*. 2006 Dec;93(12):1469-74.
- 1034 28. Vermeulen H, Hofland J, Legemate DA, Ubbink DT. Intravenous fluid restriction after major  
1035 abdominal surgery: a randomized blinded clinical trial. *Trials*. 2009;10:50.
- 1036 29. Finfer S, Bellomo R, Boyce N, French J, Myburgh J, Norton R. A comparison of albumin  
1037 and saline for fluid resuscitation in the intensive care unit. *N Engl J Med*. 2004 May  
1038 27;350(22):2247-56.
- 1039 30. Perner A, Haase N, Guttormsen AB, Tenhunen J, Klemenzson G, Aneman A, et al.  
1040 Hydroxyethyl starch 130/0.42 versus Ringer's acetate in severe sepsis. *N Engl J Med*. 2012 Jul  
1041 12;367(2):124-34.
- 1042 31. Myburgh JA, Finfer S, Bellomo R, Billot L, Cass A, Gattas D, et al. Hydroxyethyl Starch or  
1043 Saline for Fluid Resuscitation in Intensive Care. *N Engl J Med*. 2012 Oct 17.
- 1044 32. Marik PE, Baram M, Vahid B. Does central venous pressure predict fluid responsiveness? A  
1045 systematic review of the literature and the tale of seven mares. *Chest*. 2008 Jul;134(1):172-8.
- 1046 33. Peyton PJ, Chong SW. Minimally invasive measurement of cardiac output during surgery  
1047 and critical care: a meta-analysis of accuracy and precision. *Anesthesiology*. 2010 Nov;113(5):1220-  
1048 35.
- 1049 34. Noblett SE, Snowden CP, Shenton BK, Horgan AF. Randomized clinical trial assessing the  
1050 effect of Doppler-optimized fluid management on outcome after elective colorectal resection. *Br J*  
1051 *Surg*. 2006 Sep;93(9):1069-76.
- 1052 35. Conway DH, Mayall R, Abdul-Latif MS, Gilligan S, Tackaberry C. Randomised controlled  
1053 trial investigating the influence of intravenous fluid titration using oesophageal Doppler monitoring  
1054 during bowel surgery. *Anaesthesia*. 2002 Sep;57(9):845-9.
- 1055 36. Wakeling HG, McFall MR, Jenkins CS, Woods WG, Miles WF, Barclay GR, et al.  
1056 Intraoperative oesophageal Doppler guided fluid management shortens postoperative hospital stay  
1057 after major bowel surgery. *Br J Anaesth*. 2005 Nov;95(5):634-42.
- 1058 37. Futier E, Constantin JM, Petit A, Chanques G, Kwiatkowski F, Flamein R, et al.  
1059 Conservative vs restrictive individualized goal-directed fluid replacement strategy in major  
1060 abdominal surgery: A prospective randomized trial. *Arch Surg*. 2010 Dec;145(12):1193-200.
- 1061 38. Walsh SR, Tang T, Bass S, Gaunt ME. Doppler-guided intra-operative fluid management  
1062 during major abdominal surgery: systematic review and meta-analysis. *Int J Clin Pract*. 2008  
1063 Mar;62(3):466-70.
- 1064 39. Mowatt G, Houston G, Hernandez R, de Verteuil R, Fraser C, Cuthbertson B, et al.  
1065 Systematic review of the clinical effectiveness and cost-effectiveness of oesophageal Doppler



1066 monitoring in critically ill and high-risk surgical patients. *Health Technol Assess.* 2009 Jan;13(7):iii-  
1067 iv, ix-xii, 1-95.

1068 40. Davies SJ, Yates D, Wilson RJT. Dopexamine Has No Additional Benefit in High-Risk  
1069 Patients Receiving Goal-Directed Fluid Therapy Undergoing Major Abdominal Surgery. *Anesthesia*  
1070 & *Analgesia.* 2011;112(1):130-8.

1071 41. Hamilton MA, Cecconi M, Rhodes A. A systematic review and meta-analysis on the use of  
1072 preemptive hemodynamic intervention to improve postoperative outcomes in moderate and high-risk  
1073 surgical patients. *Anesth Analg.* 2011 Jun;112(6):1392-402.

1074 42. Challand C, Struthers R, Sneyd JR, Erasmus PD, Mellor N, Hosie KB, et al. Randomized  
1075 controlled trial of intraoperative goal-directed fluid therapy in aerobically fit and unfit patients  
1076 having major colorectal surgery. *Br J Anaesth.* 2012 Jan;108(1):53-62.

1077 43. Bellamy MC. Wet, dry or something else? *Br J Anaesth.* 2006 Dec;97(6):755-7.

1078 44. Varadhan KK, Neal KR, Dejong CH, Fearon KC, Ljungqvist O, Lobo DN. The enhanced  
1079 recovery after surgery (ERAS) pathway for patients undergoing major elective open colorectal  
1080 surgery: a meta-analysis of randomized controlled trials. *Clin Nutr.* 2010 Aug;29(4):434-40.

1081 45. Myles PS, Devereaux PJ. Pros and cons of composite endpoints in anesthesia trials.  
1082 *Anesthesiology.* 2010 Oct;113(4):776-8.

1083 46. Myles PS, Weitkamp B, Jones K, Melick J, Hensen S. Validity and reliability of a  
1084 postoperative quality of recovery score: the QoR-40. *Br J Anaesth.* 2000 Jan;84(1):11-5.

1085 47. Myles PS, Hunt JO, Fletcher H, Solly R, Woodward D, Kelly S. Relation between quality of  
1086 recovery in hospital and quality of life at 3 months after cardiac surgery. *Anesthesiology.* 2001  
1087 Oct;95(4):862-7.

1088 48. Myles P, Smith J, Knight J, Cooper D, Silbert B, McNeil J, et al. Aspirin and Tranexamic  
1089 Acid for Coronary Artery Surgery (ATACAS) Trial: Rationale and design. *American Heart Journal.*  
1090 2008;155(2):224-30.

1091 49. Myles PS, Leslie K, Peyton P, Paech M, Forbes A, Chan MT, et al. Nitrous oxide and  
1092 perioperative cardiac morbidity (ENIGMA-II) Trial: rationale and design. *Am Heart J.* 2009  
1093 Mar;157(3):488-94 e1.

1094 50. Myles PS, Bellomo R. A pivotal trial of fluid therapy for major abdominal surgery: need and  
1095 equipoise. *Crit Care Resusc.* 2011 Dec;13(4):278-80.

1096 51. Prowle JR, Chua HR, Bagshaw SM, Bellomo R. Clinical review: Volume of fluid  
1097 resuscitation and the incidence of acute kidney injury - a systematic review. *Crit Care.* 2012 Aug  
1098 7;16(4):230.

1099 52. Hubner M, Schafer M, Demartines N, Muller S, Maurer K, Baulig W, et al. Impact of  
1100 Restrictive Intravenous Fluid Replacement and Combined Epidural Analgesia on Perioperative  
1101 Volume Balance and Renal Function Within a Fast Track Program. *J Surg Res.* 2010 Sep 27.

1102 53. Rahbari NN, Weitz J, Hohenberger W, Heald RJ, Moran B, Ulrich A, et al. Definition and  
1103 grading of anastomotic leakage following anterior resection of the rectum: a proposal by the  
1104 International Study Group of Rectal Cancer. *Surgery.* 2010 Mar;147(3):339-51.

1105 54. Horan T, Andrus M, Dudeck M. CDC/NHSN surveillance definition of health care-  
1106 associated infection and criteria for specific types of infections in the acute care setting. *American*  
1107 *Journal of Infection Control.* 2008;36(5):309-32.

1108 55. Bellomo R, Ronco C, Kellum JA, Mehta RL, Palevsky P. Acute renal failure - definition,  
1109 outcome measures, animal models, fluid therapy and information technology needs: the Second  
1110 International Consensus Conference of the Acute Dialysis Quality Initiative (ADQI) Group. *Crit*  
1111 *Care.* 2004 Aug;8(4):R204-12.

1112 56. Rigg JR, Jamrozik K, Myles PS, Silbert BS, Peyton PJ, Parsons RW, et al. Epidural  
1113 anaesthesia and analgesia and outcome of major surgery: a randomised trial. *Lancet.* 2002 Apr  
1114 13;359(9314):1276-82.

1115 57. Hebert PC, Wells G, Blajchman MA, Marshall J, Martin C, Pagliarello G, et al. A  
1116 multicenter, randomized, controlled clinical trial of transfusion requirements in critical care.

1117 Transfusion Requirements in Critical Care Investigators, Canadian Critical Care Trials Group. N  
1118 Engl J Med. 1999 Feb 11;340(6):409-17.

1119 58. Hebert PC, Yetisir E, Martin C, Blajchman MA, Wells G, Marshall J, et al. Is a low  
1120 transfusion threshold safe in critically ill patients with cardiovascular diseases? Crit Care Med. 2001  
1121 Feb;29(2):227-34.

1122 59. Scheingraber S, Rehm M, Sehmisch C, Finsterer U. Rapid saline infusion produces  
1123 hyperchloremic acidosis in patients undergoing gynecologic surgery. Anesthesiology. 1999  
1124 May;90(5):1265-70.

1125 60. Shaw AD, Bagshaw SM, Goldstein SL, Scherer LA, Duan M, Schermer CR, et al. Major  
1126 complications, mortality, and resource utilization after open abdominal surgery: 0.9% saline  
1127 compared to Plasma-Lyte. Ann Surg. 2012 May;255(5):821-9.

1128 61. Yunos NM, Bellomo R, Hegarty C, Story D, Ho L, Bailey M. Association between a  
1129 chloride-liberal vs chloride-restrictive intravenous fluid administration strategy and kidney injury in  
1130 critically ill adults. JAMA. 2012 Oct 17;308(15):1566-72.

1131 62. Prowle JR, Liu YL, Licari E, Bagshaw SM, Egi M, Haase M, et al. Oliguria as predictive  
1132 biomarker of acute kidney injury in critically ill patients. Crit Care. 2011;15(4):R172.

1133 63. Zacharias M, Conlon NP, Herbison GP, Sivalingam P, Walker RJ, Hovhannisyan K.  
1134 Interventions for protecting renal function in the perioperative period. Cochrane Database Syst Rev.  
1135 2008(4):CD003590.

1136 64. Mamidanna R, Burns EM, Bottle A, Aylin P, Stonell C, Hanna GB, et al. Reduced Risk of  
1137 Medical Morbidity and Mortality in Patients Selected for Laparoscopic Colorectal Resection in  
1138 England: A Population-Based Study. Arch Surg. 2011 Nov 21.

1139 65. Monk T, Saini V, Weldon B, Sigl J. Anesthetic management and one-year mortality after  
1140 noncardiac surgery. Anesth Analg. 2005;100:4-10.

1141 66. Myles PS, Peyton P, Silbert B, Hunt J, Rigg JR, Sessler DI. Perioperative epidural analgesia  
1142 for major abdominal surgery for cancer and recurrence-free survival: randomised trial. BMJ.  
1143 2011;342:d1491.

1144 67. Graham AM, Myles PS, Leslie K, Chan MT, Paech MJ, Peyton P, et al. A cost-benefit  
1145 analysis of the ENIGMA trial. Anesthesiology. 2011 Aug;115(2):265-72.

1146  
1147  
1148

# 1 **RELIEF Statistical Analysis Plan**

2 **August 29, 2017**

3  
4 We will apply the intention to treat principle, analysing all participants who are enrolled,  
5 randomised and undergo induction of general anaesthesia for eligible surgery. Patients are  
6 followed for the duration of the trial, unless they withdraw consent, for which we will use  
7 their data up until the time of withdrawal of consent.

## 8 9 **ENDPOINT DEFINITIONS**

### 10 **Primary endpoint**

11 The primary end point of the trial is disability-free survival at 1 year after surgery. Disability  
12 is defined as a persistent (at least 6 months) impairment in health status, as measured by  
13 the 12-item WHODAS score, of at least 24 points when using response scores of 1–5 for  
14 each item, reflecting a disability level of at least 25% and being the threshold point between  
15 ‘disabled’ and ‘not disabled’ as per WHO guidelines. If a single item is missing at an  
16 assessment, the mean value of the remaining items will be assigned to the missing item. If  
17 more than one item is missing the score will not be calculated for that assessment.

18 With WHODAS assessments being made at (baseline and) 30 days, 3 months, 6 months and  
19 12 months, post-operative disability that persists for at least 6 months is able to be  
20 observed to be commencing at the 30 day assessment, the 3 month assessment, or the 6  
21 month assessment. For example, persistent disability commencing at 3 months requires the  
22 initial observation of disability (WHODAS  $\geq 24$ ) at 3 months which is sustained at each of  
23 the 6 and 12 month assessments. Missing WHODAS assessments in patients known to be  
24 alive will not be imputed in the primary analysis. Persistent disability observed to  
25 commence at the 30 day assessment will be assumed to be related to surgery and will be  
26 assigned an onset date of 0.10 days post-surgery. Onset of disability at 3 or 6 months  
27 postoperatively will typically be after an incident/illness in the postoperative follow-up  
28 period, and for these events the self-reported date of such onset will be utilised. If no such  
29 event is documented, then the current time point (interview date) will be used.

30 The time to the primary endpoint is defined as the time of the onset of persistent ( $\geq 6$ -  
31 month) disability or death, whichever occurs first. Time at risk will commence at start of  
32 surgery to accommodate the potential for intraoperative mortality. Patients not  
33 experiencing the primary endpoint event will be censored at their date of last contact.

34 Two supplementary approaches will be utilised to assess sensitivity to handling of missing  
35 WHODAS assessments for subjects known to be alive at those assessment times: (a) they  
36 will be given a disabled score (WHODAS of 24), and (b) they will be imputed using  
37 information from baseline and post-baseline variables (see statistical analysis methods).

38

39 **Alternative ‘new onset disability’ definition of the primary endpoint**

40 An additional sensitivity analysis will done for an alternative definition of persistent  
41 disability, considered as ‘new onset’ persistent disability, defined as an increase from  
42 baseline of  $\geq 4$  points in WHODAS scores that persists for at least 6 months. The definition  
43 of time to the first of new-onset persistent disability or death will use the same principles as  
44 for the primary endpoint.

45

46 **Secondary endpoints**

- 47 1. Death/survival: all-cause mortality at 90 days, and survival up to 12 months after  
48 surgery.
- 49
- 50 2. A composite (pooled) and individual incidence of 30-day mortality and major septic  
51 complications, where the latter is defined as the composite of sepsis, surgical site  
52 infection, anastomotic leak and pneumonia at 30 days post-surgery. [Detailed clinical  
53 definitions are provided in the Protocol]
- 54
- 55 3. Acute Kidney Injury (AKI): according to the Kidney Disease: Improving Global  
56 Outcomes group criteria, but not urine output—for Stage 2 or worse AKI defined as  
57 at least twofold increase in creatinine, or estimated glomerular filtration rate  
58 decrease  $>50\%$ .

59

60 Since a restrictive intravenous fluid regimen may artificially elevate serum creatinine  
61 due to a smaller dilutional effect from less intravenous fluids, we will calculate  
62 adjusted creatinine following the approach of Liu (2011, Reference 1 below), where  
63  $adjusted\ creatinine = serum\ creatinine \times (1 + cumulative\ fluid\ balance / total\ body\ water)$ ,  
64 and assuming that total body water is 60% of body weight, expressed in mL. Serum  
65 creatinine is measured on days 1 and 3 and the maximum value in the patient’s hospital  
66 stay. We will apply adjustments to creatinine levels at days 1 and 3 only. Fluid intake will be  
67 accumulated using IV fluids administered intraoperatively, in recovery, and on days 1 to 3  
68 postoperatively, plus the volume of any blood transfusions administered. Fluid outputs from  
69 the time of surgery to Day 1 post-surgery will be accumulated using the recorded urine  
70 outputs, blood losses and volumes in surgical drains. Missing fluid output components will  
71 be imputed to prevent adjustment factors being missing when creatinine levels are present.  
72 Fluid outputs on days 2 and 3 are not recorded, so these will be estimated under the  
73 assumption of a net fluid balance of zero on each of days 2 and 3; this will form the principal  
74 analysis. Sensitivity to this assumption will be assessed using two alternatives: (a) assuming a  
75 zero cumulative fluid balance at day 3, and (b) assuming the ratio of intake to outputs up to  
76 day 1 persists on days 2 and 3. These two assumptions enclose that of the principal analysis.  
77 We will also report the use of renal replacement therapy up to 90 days after surgery;  
78 and delta-creatinine, defined as the difference between the maximum (fluid-  
79 adjusted) postoperative serum creatinine level and the preoperative serum  
80 creatinine level.

81

- 82 4. Pulmonary oedema: documented evidence of respiratory distress or impaired  
83 oxygenation and radiological evidence of pulmonary oedema.

84

- 85 5. Duration of mechanical ventilation: Defined as additive over all episodes up to 90  
86 days after surgery. This will be reported as (a) the proportion of patients requiring  
87 ventilation; and (b) the duration of ventilation in patients receiving ventilation.  
88
- 89 6. Inflammation: plasma C reactive protein concentration on day 3 after surgery.  
90
- 91 7. Tissue perfusion marker: peak serum lactate concentration within 24 hours of  
92 surgery.  
93
- 94 8. Any blood transfusion: including red cell, fresh frozen plasma or platelet transfusion,  
95 from the initiation of surgery; and quantity of transfusion in patients receiving each  
96 product.  
97
- 98 9. Unplanned admission to HDU/ICU within 30 days of surgery.  
99
- 100 10. Total HDU/ICU stay in patients admitted to HDU/ICU, including initial admission and  
101 readmission duration up to day 30  
102
- 103 11. Total hospital stay, including any readmission up to day 30.  
104
- 105 12. Quality of recovery: QoR-15 score on days 1, 3 and 30.  
106
- 107 13. The rates of serious adverse events, and severity of adverse events (mild, moderate,  
108 severe), classified by organ system.  
109  
110

## 111 **STATISTICAL ANALYSES**

### 112 **Primary endpoint: disability-free survival**

113 Disability free survival will be displayed with Kaplan-Meier plots, and described with event-  
114 free proportions in each treatment arm obtained from these plots at days 1, 30, 90, 180 and  
115 365 days post-surgery. Comparison of overall time to events between treatment arms will  
116 be made using the log rank test and the Cox proportional hazards model to provide a hazard  
117 ratio and 95% CI. Assessment of proportionality of hazards will be based on tests using  
118 Schoenfeld residuals. The principal analysis will not impute missing WHODAS measurements  
119 for patients known to be alive at those assessment times. The first sensitivity analysis will  
120 impute all missing WHODAS assessments for subjects known to be alive at those assessment  
121 times by giving them a disabled score (WHODAS of 24). A second sensitivity analysis will  
122 impute the missing WHODAS assessments using multiple imputation, with the imputation  
123 model employing baseline and post-baseline information predictive of missingness or  
124 WHODAS scores, separately in each treatment arm, with results combined across  
125 imputations using Rubin's rules.

126

127 **Alternative ‘new onset’ definition of the primary endpoint**

128 Analysis of disability-free survival based on the ‘new onset’ persistent disability definition  
129 will follow the same approach as for the primary endpoint.

130 **Time to death**

131 Analysis of time to death will follow the same approach as for the primary endpoint.

132 **Other outcomes**

133 Secondary outcomes measured on a binary scale (1, 2, 3, 4, 8, 9) will be summarised using  
134 proportions in each treatment arm and analysed using binomial regression with a  
135 logarithmic link to estimate Risk Ratios with 95% CIs and p-values, or exact logistic  
136 regression to approximate Risk ratios if the number of events in either arm is fewer than 10.  
137 Should there be convergence difficulties with log-binomial regression, a log-Poisson model  
138 will be employed with robust standard errors.

139

140 Duration and length of stay outcomes (5, 10, 11) will be summarised using medians and  
141 interquartile ranges, and compared across treatment arms using the Wilcoxon– Breslow–  
142 Gehan test, with length of stay in hospital and in intensive care censored at 30 days, and  
143 with in-hospital deaths assigned the highest length of stay.

144

145 Outcomes measured on a continuous or semi-continuous scale (6, 7, 8, 12) will be  
146 summarised by means and standard deviations if reasonably symmetrically distributed and  
147 compared between treatment arms using linear regression with robust standard errors.  
148 Skewed outcomes will be summarised by medians and interquartile ranges; right skewed  
149 outcomes will be log-transformed prior to analysis using linear regression, and left skewed  
150 outcomes will be analysed using median regression with robust standard errors.

151

152 **Additional sensitivity analyses**

153 Sensitivity analyses for all outcomes will use regression models with additional adjustment  
154 for the stratification variables of site and planned HDU/ICU destination status, plus any  
155 variables exhibiting substantial imbalance across treatment arms at baseline.

156 Sensitivity to missing outcome data will be performed using multiple imputation if the  
157 proportion of missing data for the particular outcome is >5%. These analyses will use  
158 multiple imputation, employing imputation models with baseline and auxiliary post-baseline  
159 variables, and results combined across imputations using Rubin’s rule.

160

161 **Subgroup analyses**

162 Planned subgroup analyses will assess heterogeneity of treatment effects of the primary  
163 endpoint across patient sex, age groups (approximate quartiles), country, bowel surgery  
164 (yes/no) and intraoperative use of any goal-directed techniques (yes/no). The latter include  
165 invasive or non-invasive cardiac output, stroke volume or pulse pressure variation and  
166 oesophageal Doppler, but exclude central venous pressure monitoring.

167

168 Additional prespecified subgroups will be tested for heterogeneity of effect, and their  
169 results considered exploratory: BMI categories (defined as underweight <18.5, normal 18.5-  
170 25, overweight 25-30, obese 30-35, super obese >35), ASA physical status (1/2, 3, 4), pre-  
171 operative planned HDU/ICU destination status, duration of surgery (approximate quartiles),  
172 and pre-operative planned use of a goal directed device (excluding CVP monitoring).

173 Additional analyses of the above subgroups will be performed for the endpoints of new-  
174 onset disability, composite of 30 day mortality and septic complications, and acute kidney  
175 injury.

176 For these analyses, we will undertake tests for interaction by adding treatment-by-covariate  
177 terms to the regression models specified for the main analyses of each outcome.

178

### 179 **SAMPLE SIZE RE-ESTIMATION**

180 The original sample size calculation was as follows: Assuming a 12 month disability-free  
181 survival probability of 65%, 2650 patients were required to detect a hazard ratio of 0.80  
182 with 90% power using the Freedman method for the sample size for a log rank test.

183 Correspondingly, 850 events were expected to be observed. The sample size was inflated to  
184 a total of 2800 patients to account for withdrawals and loss to follow-up.

185 A sample size reassessment of the assumed primary endpoint event rate was performed  
186 after 2578 patients had been randomised. At that time there were 300 primary endpoint  
187 events with a 12 month event rate of approximately 15%. Increasing the target sample size  
188 to 3000 patients under this same event rate was expected to yield approximately 380 events  
189 and afford 80% power to detect a hazard ratio of 0.75.

190

### 191 **REFERENCES**

- 192 1. Liu KD, Thompson BT, Ancukiewicz M, et al. Acute kidney injury in patients with acute  
193 lung injury: impact of fluid accumulation on classification of acute kidney injury and  
194 associated outcomes. Crit Care Med 2011;39:2665-71
